# Supplementary material for: Methylation status of genes escaping from X-chromosome inactivation in patients with X-chromosome rearrangements
Source: PubMed Central journal article supplement (PMC8244138; doi:10.1186/s13148-021-01121-6), 2021-06-30
Supplement: 13148_2021_1121_MOESM1_ESM.pdf [file 13148_2021_1121_MOESM1_ESM.pdf]

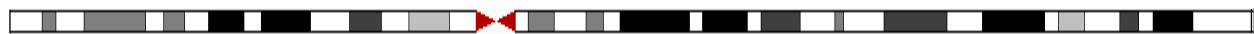

Patient 1

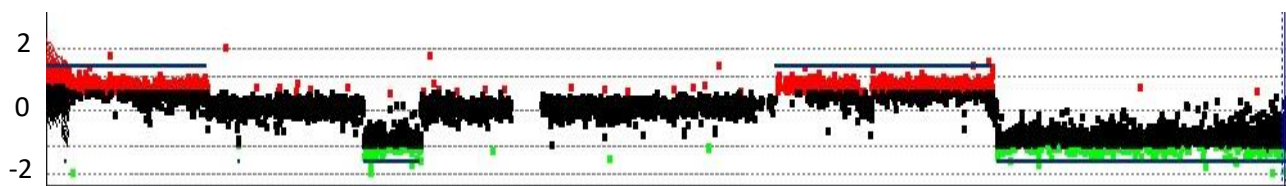

Patient 2

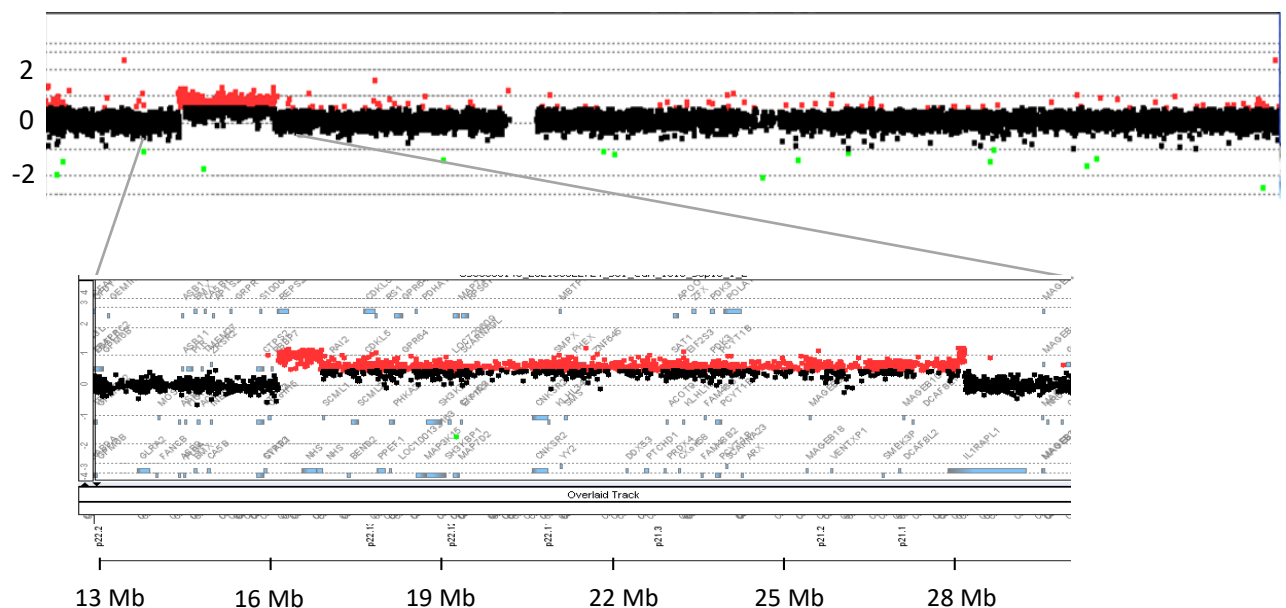

Patient 3

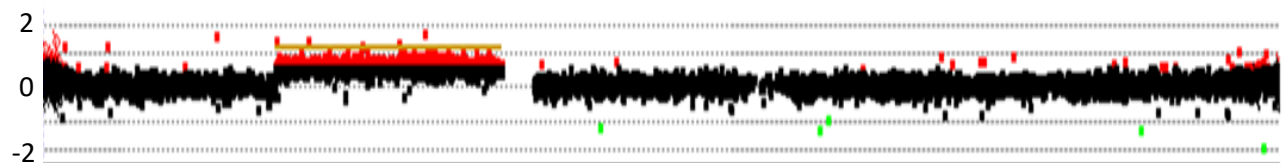

Patient 4

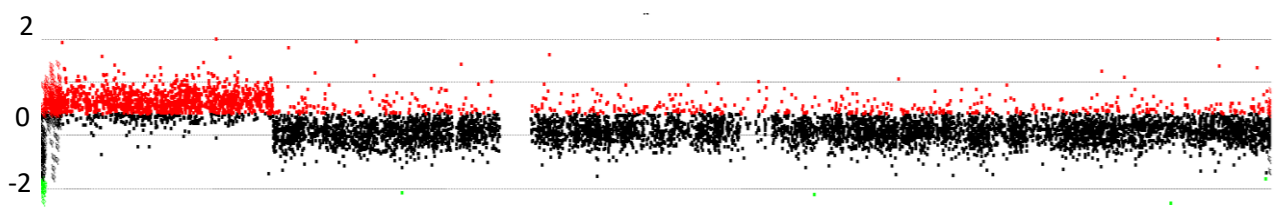

**Figure S1. Array-based comparative genomic hybridization of X chromosome of the patients.** The black dots show normal copy numbers. The red dots denote increased (log ratio higher than +0.4) copy numbers. The green dots show decreased (log ratio lower than -0.8) copy numbers. Patient 2's Xp was partially enlarged in order to show the copy number could be partially four.
