# Supplementary material for: Methylation status of genes escaping from X-chromosome inactivation in patients with X-chromosome rearrangements
Source: PubMed Central journal article supplement (PMC8244138; doi:10.1186/s13148-021-01121-6), 2021-06-30
Supplement: 13148_2021_1121_MOESM2_ESM.pdf [file 13148_2021_1121_MOESM2_ESM.pdf]

**Table S1. Confirmed or estimated breakpoints in four patients**

| Patient    | Fusion junction | Chromosomal position (hg19) | Confirmed by direct sequencing or estimated |
|------------|-----------------|-----------------------------|---------------------------------------------|
| 1          | #1              | 18,222,188                  | confirmed                                   |
|            |                 | 46,828,523                  | confirmed                                   |
|            | #2              | 46,810,797                  | estimated                                   |
|            |                 | 46,830,605                  | estimated                                   |
|            | #3              | 114633605                   | confirmed                                   |
|            |                 | 99,658,792                  | confirmed                                   |
|            | #4              | 91,203,064                  | confirmed                                   |
|            |                 | 103,226,951                 | confirmed                                   |
|            | #5              | 118,305,930                 | confirmed                                   |
|            |                 | 114,665,469                 | confirmed                                   |
|            | #6              | 118,824,468                 | confirmed                                   |
|            |                 | 24,083,844                  | confirmed                                   |
|            | #7              | 39,669,564                  | confirmed                                   |
| 23,983,985 |                 | confirmed                   |                                             |
| #8         | 18,418,446      | confirmed                   |                                             |
|            | 101,390,919     | confirmed                   |                                             |
| #9         | 99,818,115      | confirmed                   |                                             |
|            | 20,124,322      | confirmed                   |                                             |
| 2          | #1              | 29,351,253                  | estimated                                   |
|            |                 | 16,986,529                  | estimated                                   |
|            | #2              | 17,729,202                  | confirmed                                   |
|            |                 | 29,348,154                  | confirmed                                   |
|            | #3              | 29,348,219                  | confirmed                                   |
|            |                 | 28,793,876                  | confirmed                                   |
|            | #4              | 28,904,061                  | confirmed                                   |
| 29,348,217 |                 | confirmed                   |                                             |
| #1'        | 29,351,253      | estimated                   |                                             |
|            | 16,986,529      | estimated                   |                                             |
| 3          | #1              | 58,430,821                  | confirmed                                   |
|            |                 | 29,672,869                  | confirmed                                   |
| 4          | #1              | 760,749                     | confirmed                                   |
|            |                 | 758,769                     | confirmed                                   |
