# Supplementary material for: Methylation status of genes escaping from X-chromosome inactivation in patients with X-chromosome rearrangements
Source: PubMed Central journal article supplement (PMC8244138; doi:10.1186/s13148-021-01121-6), 2021-06-30
Supplement: 13148_2021_1121_MOESM3_ESM.pdf [file 13148_2021_1121_MOESM3_ESM.pdf]

# Patient 1

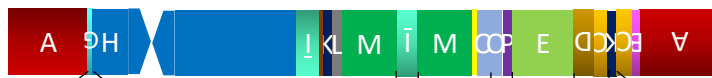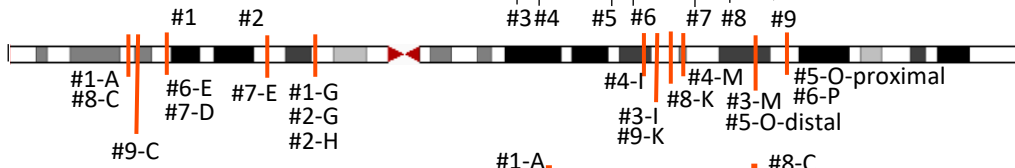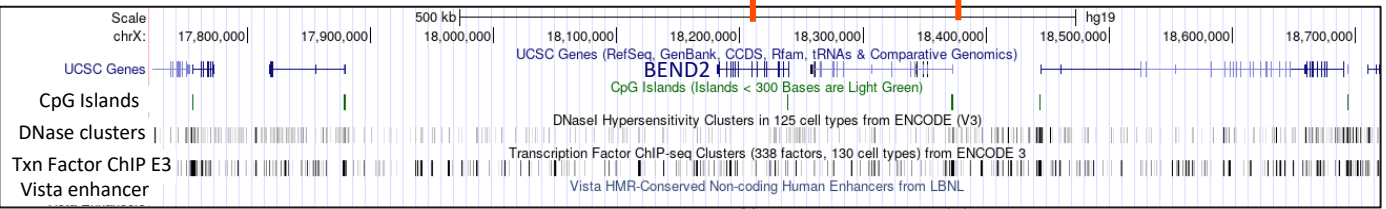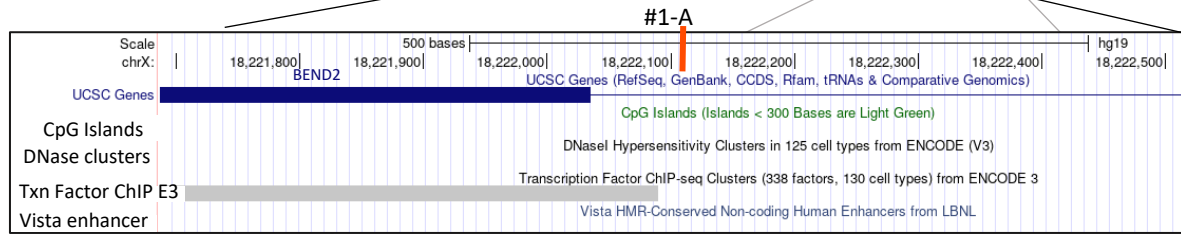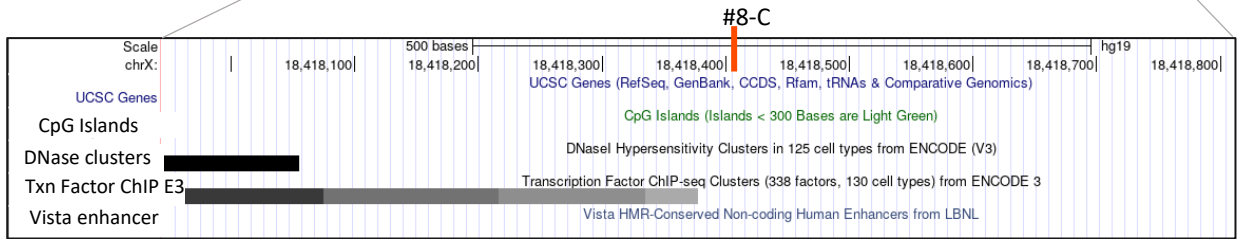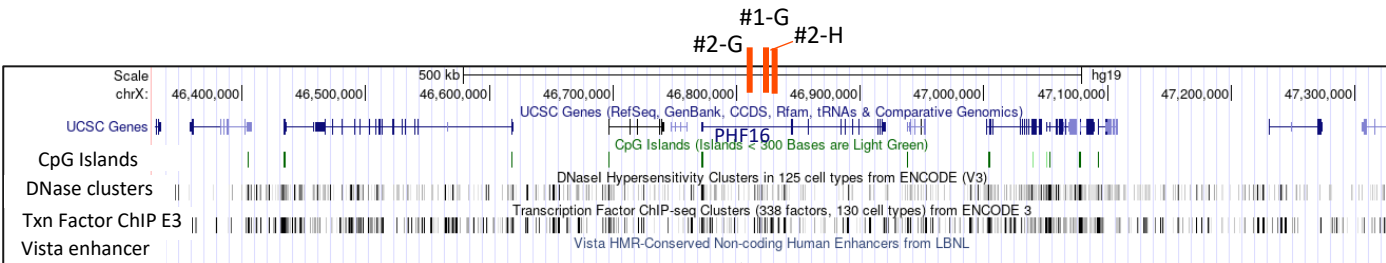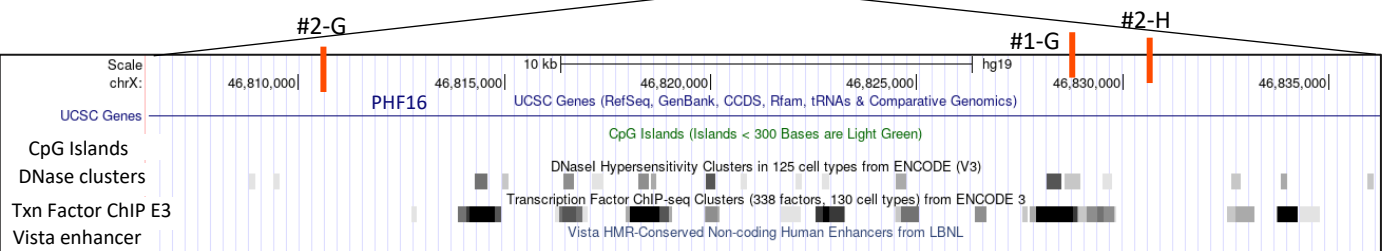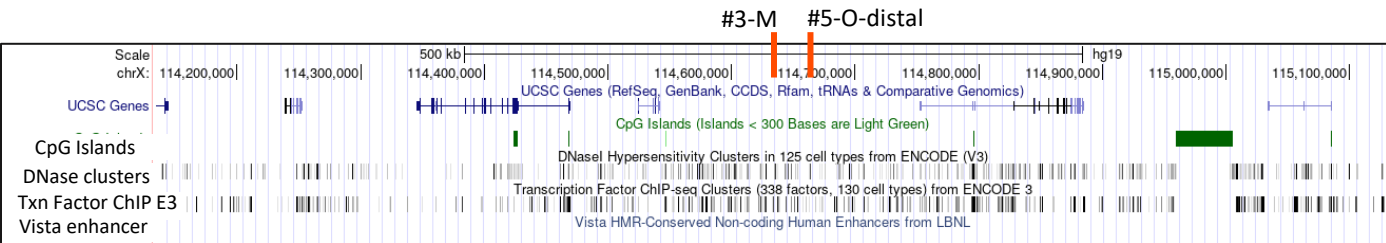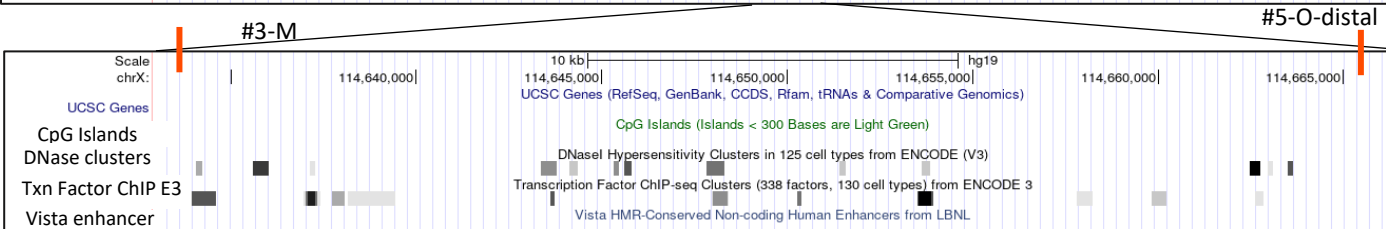

# Patient 1

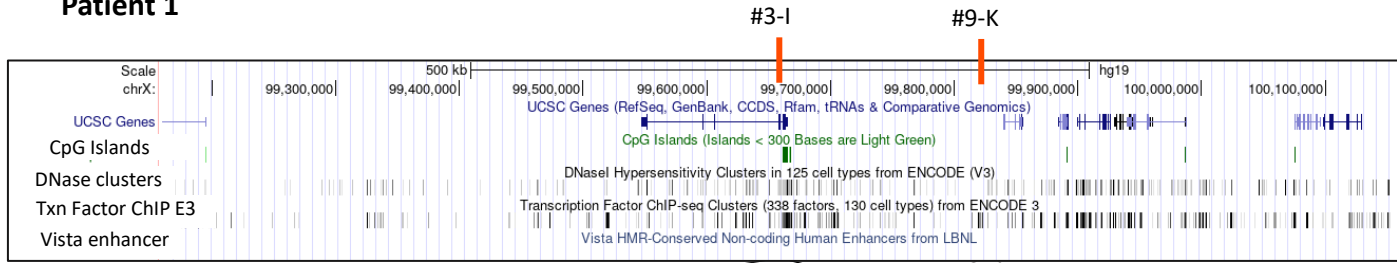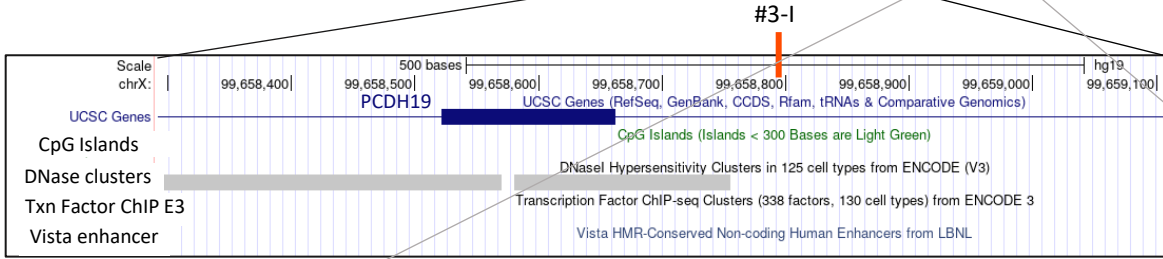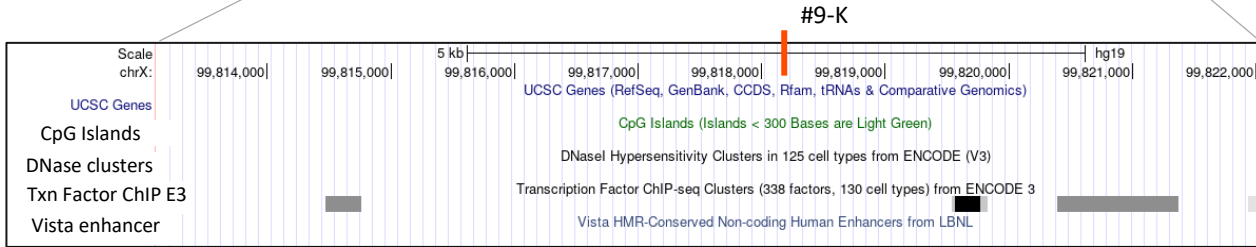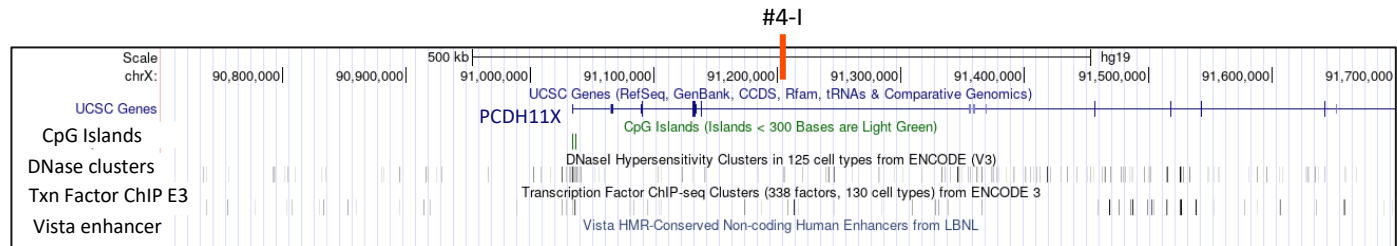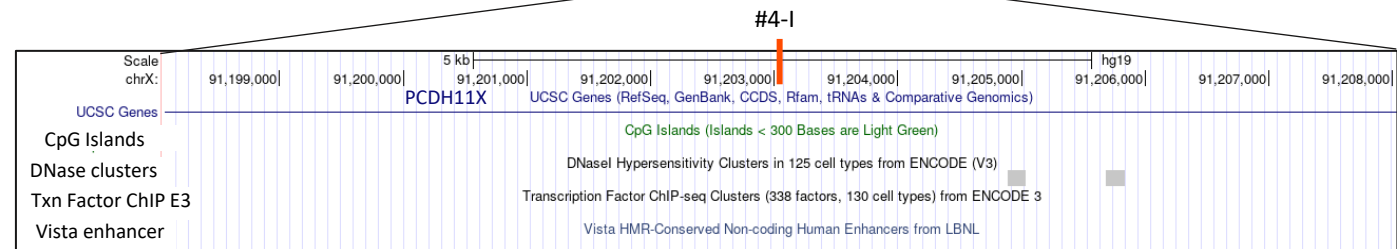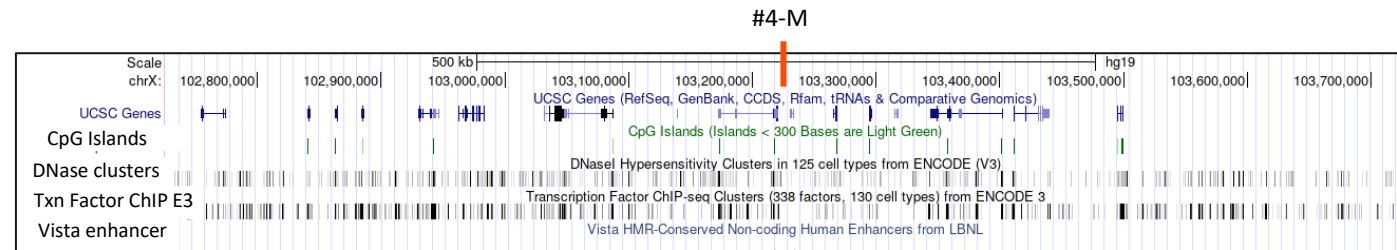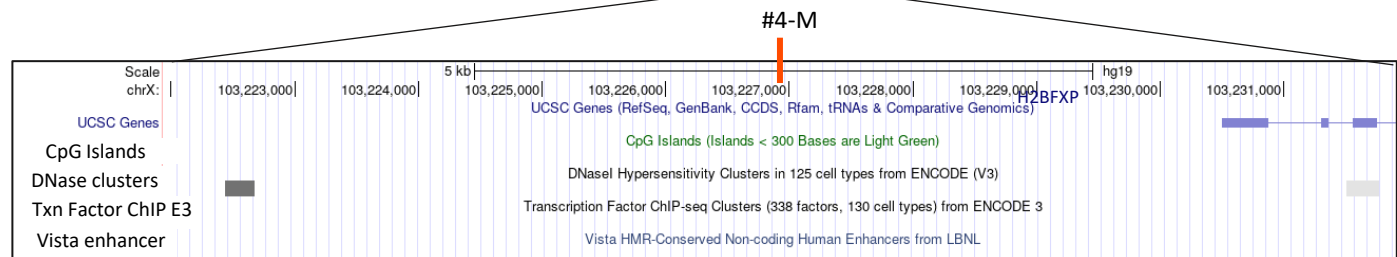

# Patient 1

#5-O-proximal

#6-P

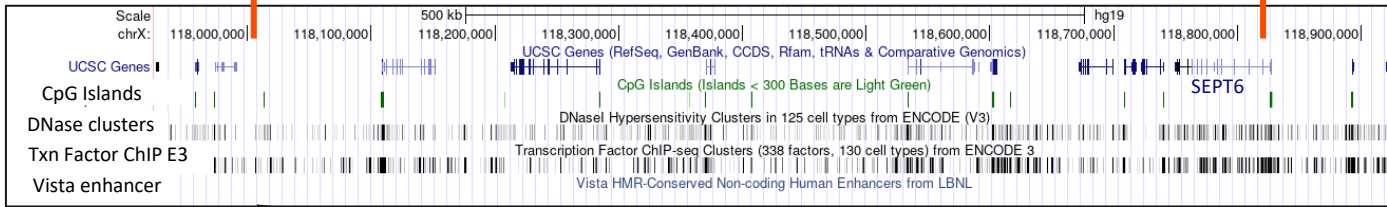

#5-O-proximal

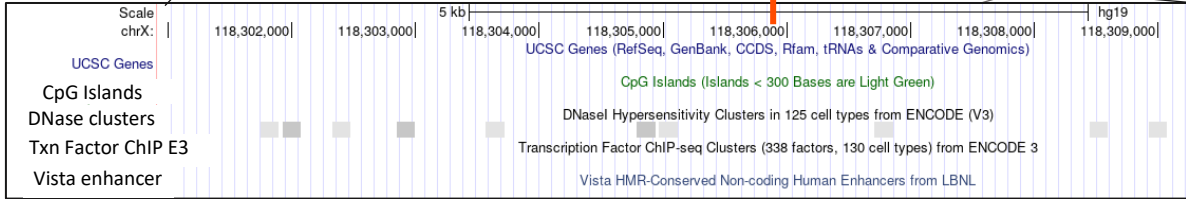

#6-P

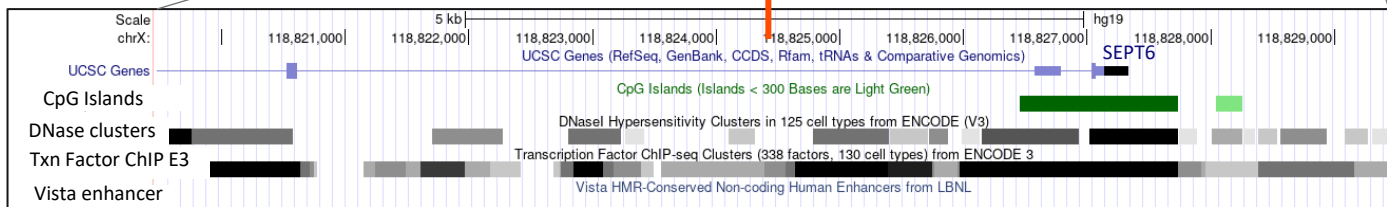

#7-D

#6-E

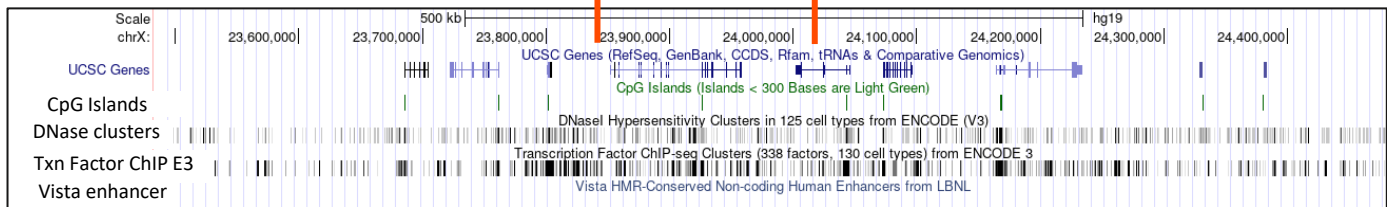

#7-D

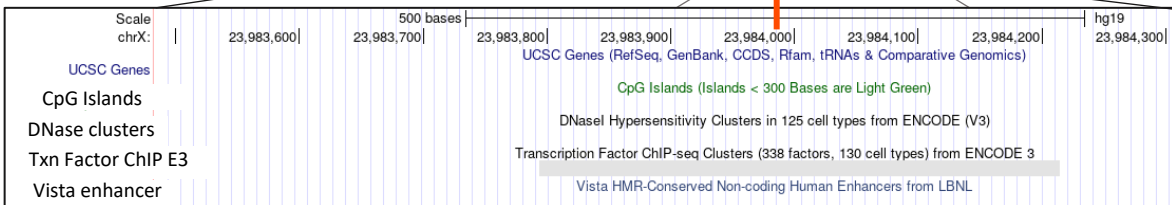

#6-E

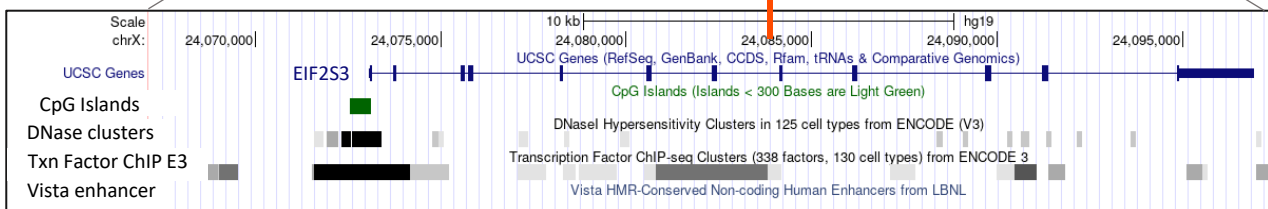

#7-E

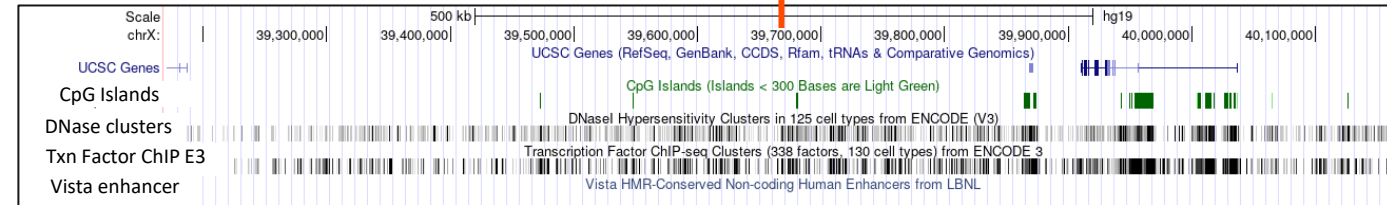

#7-E

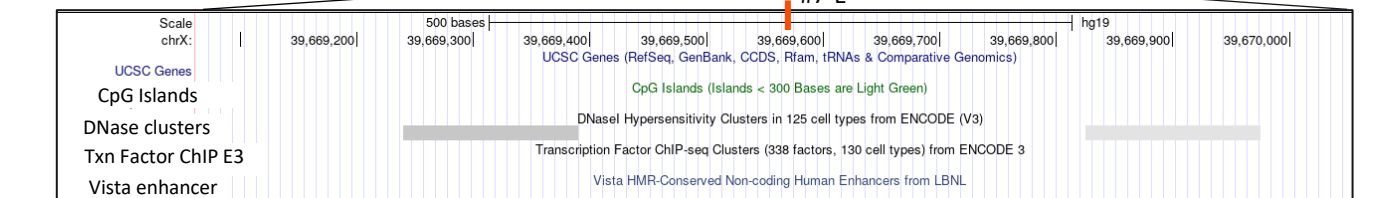

# Patient 1

#8-K

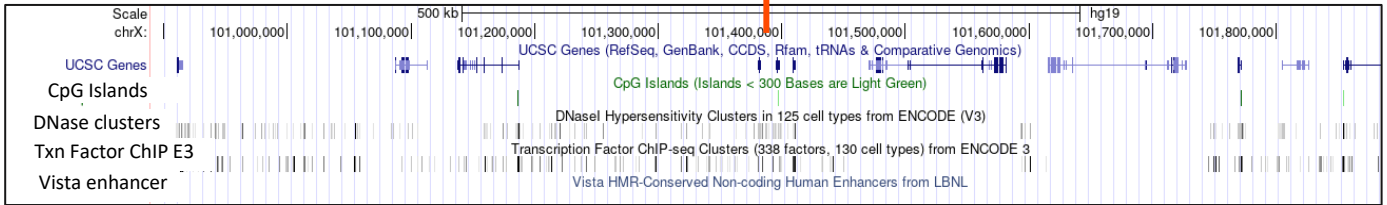

#8-K

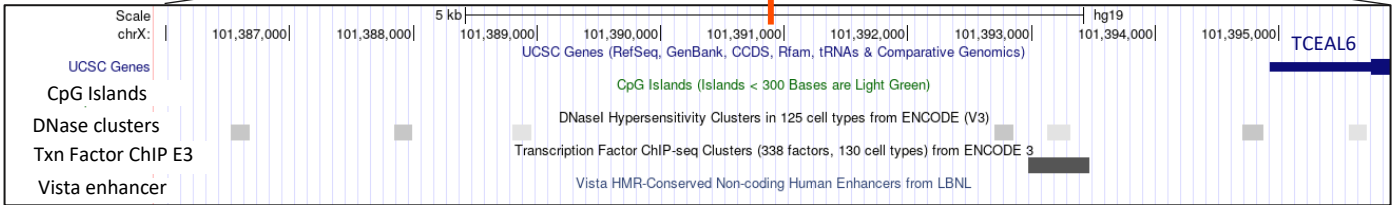

#9-C

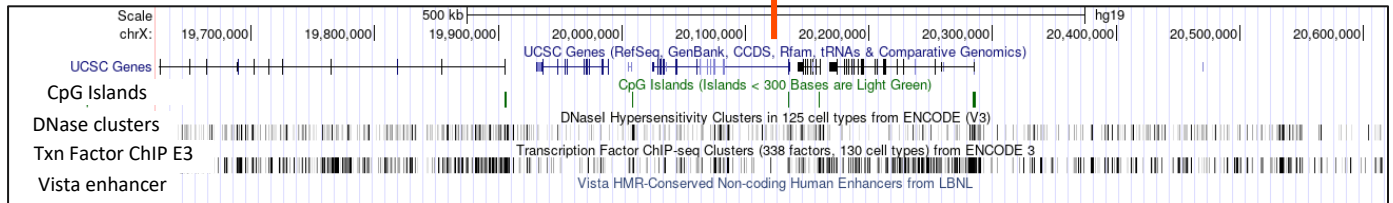

#9-C

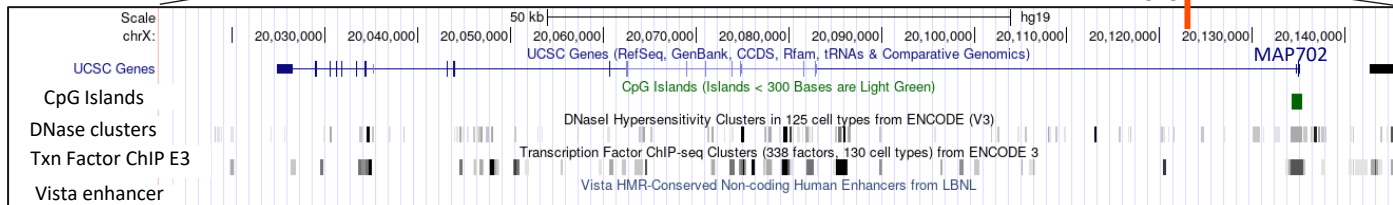

# Patient 2

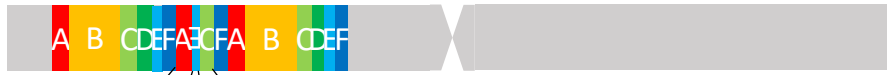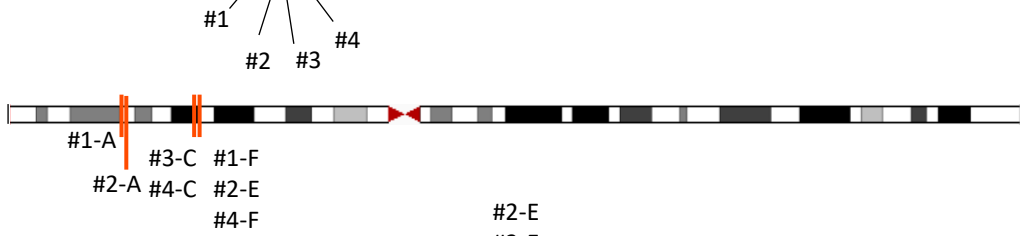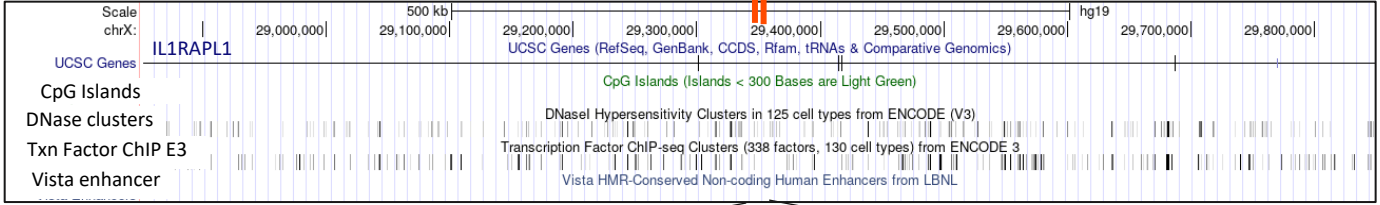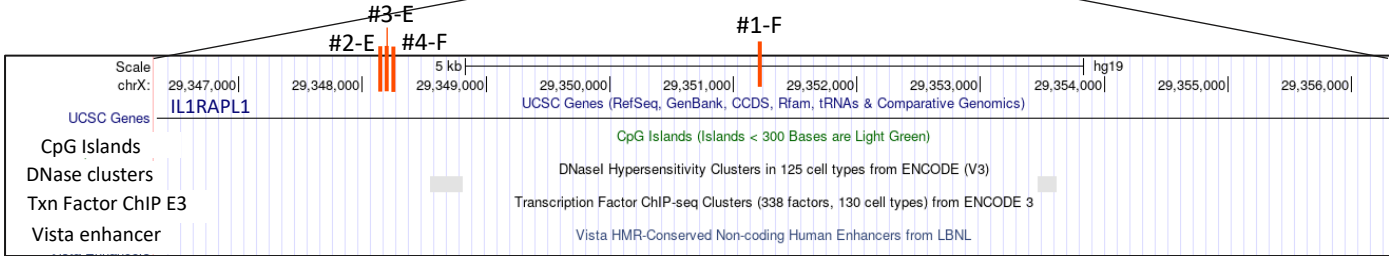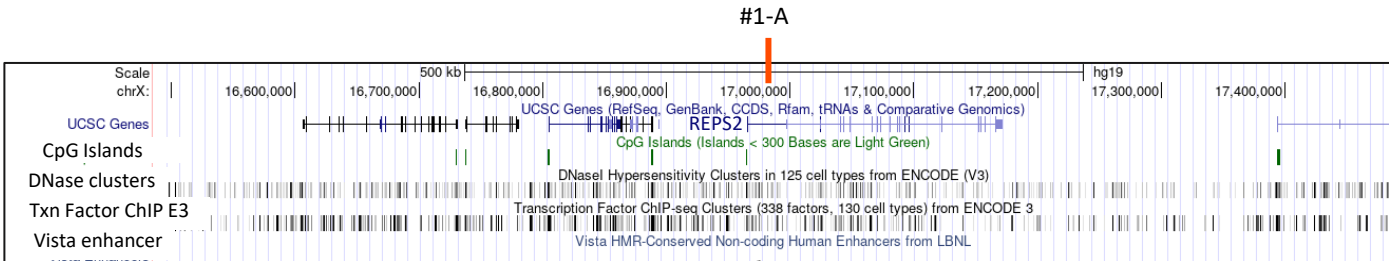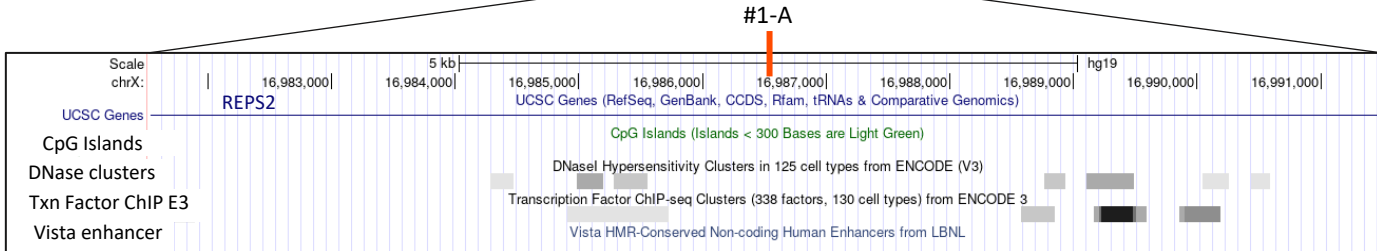

# Patient 2

#2-A

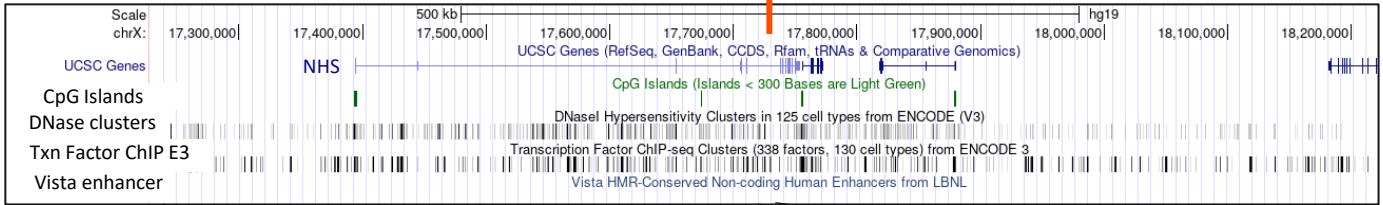

#2-A

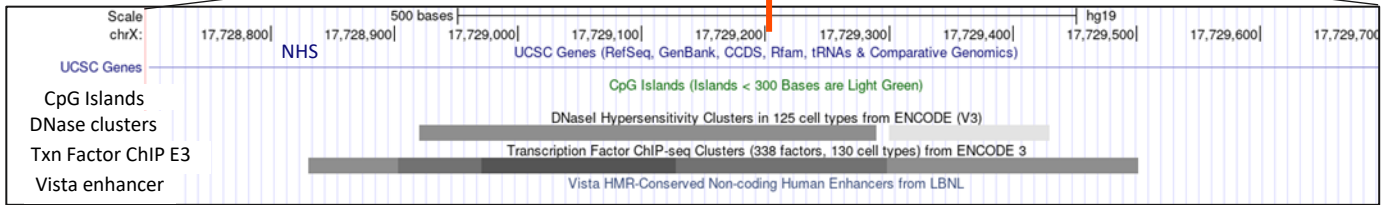

#3-C

#4-C

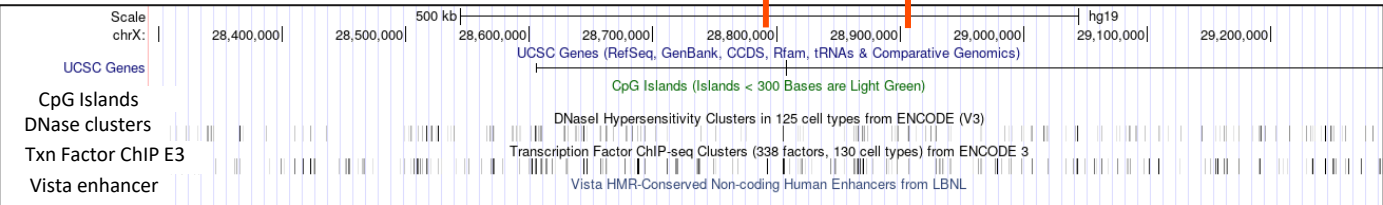

#3-C

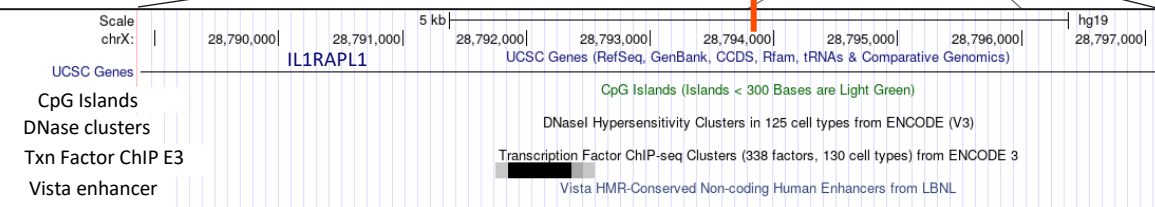

#4-C

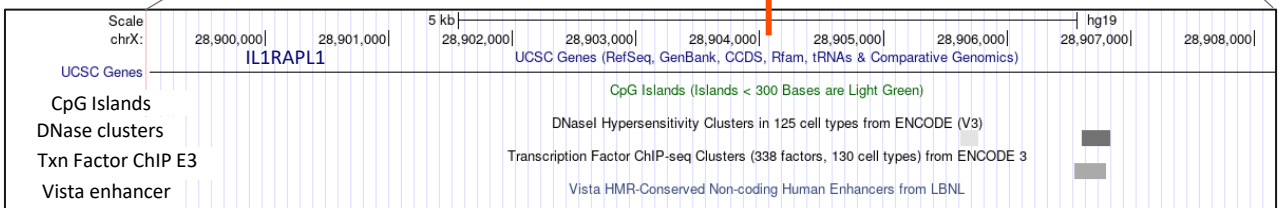



### Patient 3

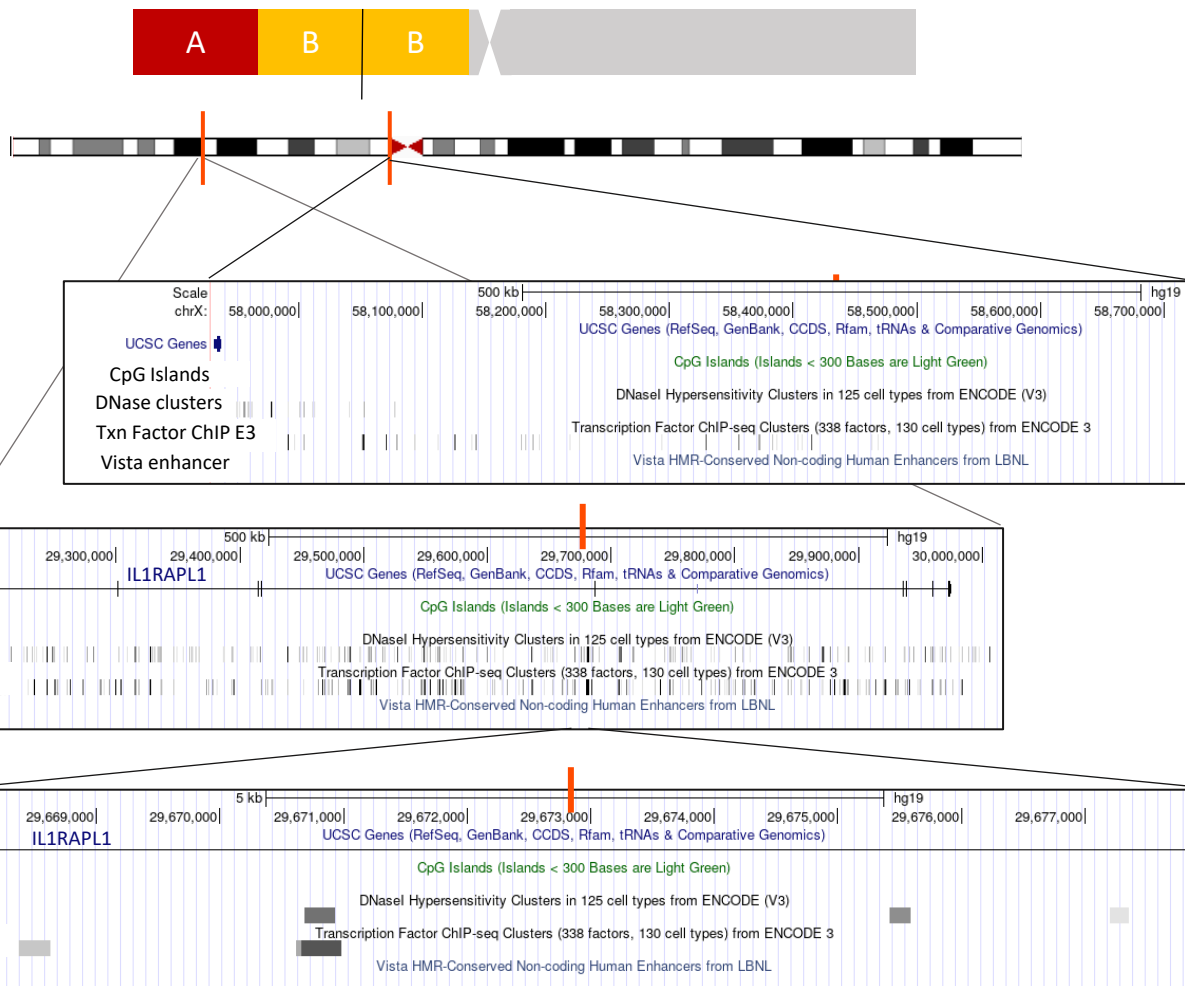

### Patient 4

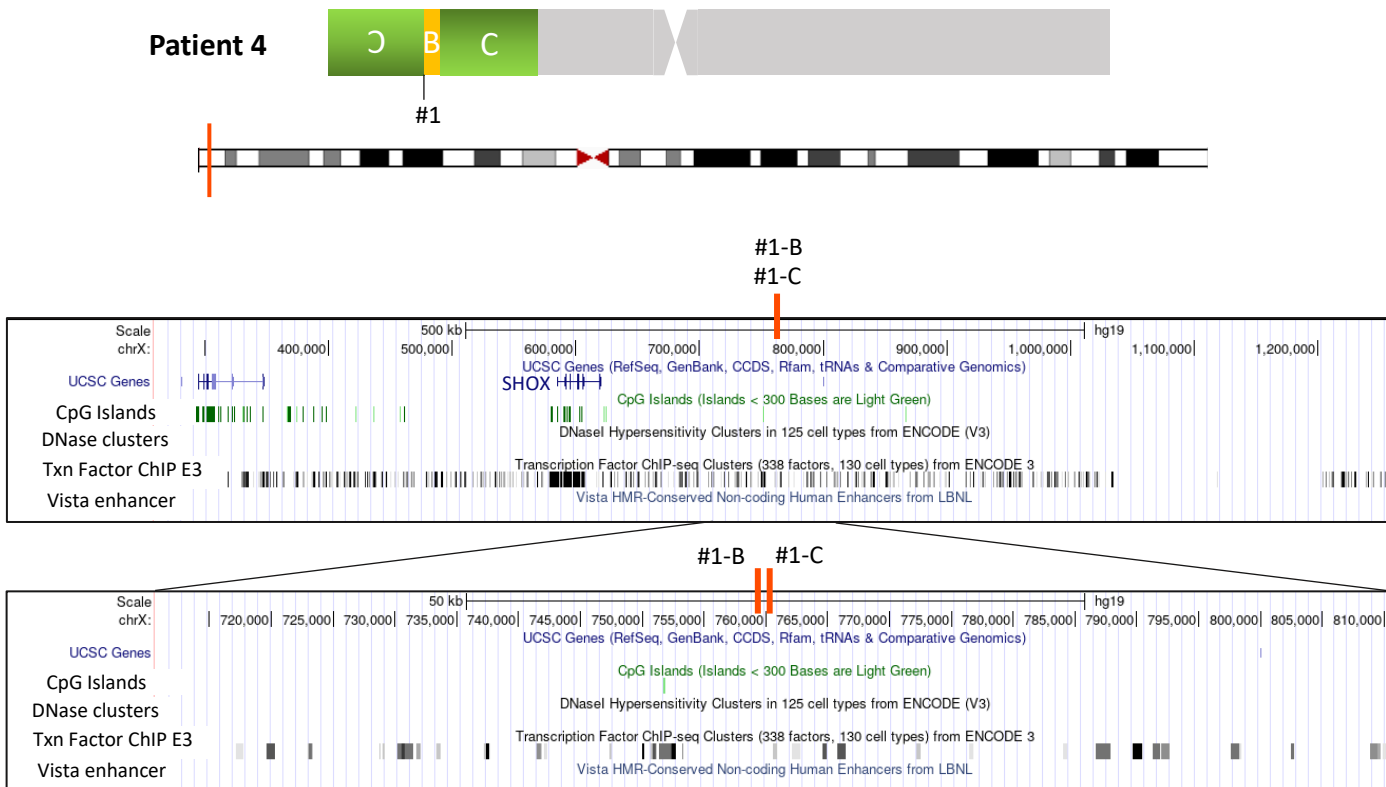

**Figure S2. Breakpoint location.** Red lines indicate breakpoints. The numbers with # are the same as in Table S1. The letter after the number shows which side of the breakpoint. CpG islands, DNases Clusters, Transcripts Factor Chip E3, and Vista Enhancers were referred from the UCSC Genome browser (<https://genome.ucsc.edu/>)
