# Supplementary material for: Methylation status of genes escaping from X-chromosome inactivation in patients with X-chromosome rearrangements
Source: PubMed Central journal article supplement (PMC8244138; doi:10.1186/s13148-021-01121-6), 2021-06-30
Supplement: 13148_2021_1121_MOESM5_ESM.pdf [file 13148_2021_1121_MOESM5_ESM.pdf]

**Table S2. The copy number of each escape gene in four patients**

| Region            | Analysis           | Escape gene        | Patient 1          | Patient 2          | Patient 3          | Patient 4   |
|-------------------|--------------------|--------------------|--------------------|--------------------|--------------------|-------------|
| PAR1              | RRBS               | <i>PLCXD1</i>      | duplication        | normal copy number | normal copy number | deletion    |
|                   |                    | <i>PPP2R3B</i>     | duplication        | normal copy number | normal copy number | deletion    |
|                   |                    | <i>SHOX</i>        | duplication        | normal copy number | normal copy number | deletion    |
|                   |                    | <i>SLC25A6</i>     | duplication        | normal copy number | normal copy number | duplication |
|                   |                    | <i>ASMTL</i>       | duplication        | normal copy number | normal copy number | duplication |
|                   |                    | <i>AKAP17A</i>     | duplication        | normal copy number | normal copy number | duplication |
|                   |                    | <i>CD99P1</i>      | duplication        | normal copy number | normal copy number | duplication |
|                   |                    | <i>CD99</i>        | duplication        | normal copy number | normal copy number | duplication |
| X-specific region | EPIC               | <i>ARSD</i>        | duplication        | normal copy number | normal copy number | duplication |
|                   |                    | <i>MXRA5</i>       | duplication        | normal copy number | normal copy number | duplication |
|                   |                    | <i>PRKX</i>        | duplication        | normal copy number | normal copy number | duplication |
|                   |                    | <i>NLGN4X</i>      | duplication        | normal copy number | normal copy number | duplication |
|                   |                    | <i>PNPLA4</i>      | duplication        | normal copy number | normal copy number | duplication |
|                   |                    | <i>KAL1</i>        | duplication        | normal copy number | normal copy number | duplication |
|                   |                    | <i>TCEANC</i>      | duplication        | normal copy number | normal copy number | duplication |
|                   |                    | <i>RAB9A</i>       | duplication        | normal copy number | normal copy number | duplication |
|                   |                    | <i>TRAPPC2</i>     | duplication        | normal copy number | normal copy number | duplication |
|                   |                    | <i>GPM6B</i>       | duplication        | normal copy number | normal copy number | duplication |
|                   |                    | <i>GEMIN8</i>      | duplication        | normal copy number | normal copy number | duplication |
|                   |                    | <i>CA5BP1</i>      | duplication        | normal copy number | normal copy number | duplication |
|                   |                    | <i>CA5B</i>        | duplication        | normal copy number | normal copy number | duplication |
|                   |                    | <i>ZRAR2</i>       | duplication        | normal copy number | normal copy number | duplication |
|                   |                    | <i>AP1S2</i>       | duplication        | normal copy number | normal copy number | duplication |
|                   |                    | <i>CTPS2</i>       | duplication        | normal copy number | normal copy number | duplication |
|                   |                    | <i>SYAP1</i>       | duplication        | normal copy number | normal copy number | duplication |
|                   |                    | <i>TXLNG</i>       | duplication        | normal copy number | normal copy number | duplication |
|                   |                    | <i>EIF1AX</i>      | normal copy number | duplication        | normal copy number | duplication |
|                   |                    | <i>EIF2S3</i>      | normal copy number | duplication        | normal copy number | duplication |
| <i>ZFX</i>        | normal copy number | duplication        | normal copy number | duplication        |                    |             |
| <i>CXorf38</i>    | deletion           | normal copy number | duplication        | normal copy number |                    |             |
| <i>DDX3X</i>      | deletion           | normal copy number | duplication        | normal copy number |                    |             |

|               |                    |                    |                    |                    |
|---------------|--------------------|--------------------|--------------------|--------------------|
| <i>FUNDC1</i> | deletion           | normal copy number | duplication        | normal copy number |
| <i>KDM6A</i>  | deletion           | normal copy number | duplication        | normal copy number |
| <i>UBA1</i>   | normal copy number | normal copy number | duplication        | normal copy number |
| <i>CDK16</i>  | normal copy number | normal copy number | duplication        | normal copy number |
| <i>KDM5C</i>  | normal copy number | normal copy number | duplication        | normal copy number |
| <i>IQSEC2</i> | normal copy number | normal copy number | duplication        | normal copy number |
| <i>RPS4X</i>  | normal copy number | normal copy number | normal copy number | normal copy number |
| <i>JPX</i>    | normal copy number | normal copy number | normal copy number | normal copy number |
| <i>LICAM</i>  | deletion           | normal copy number | normal copy number | normal copy number |

PAR1, pseudoautosomal region 1; RRBS, Reduced Representation Bisulfite Sequencing

The three genes which showed abnormal methylation in Patient 1 are boldfaced.
