# Supplementary material for: Methylation status of genes escaping from X-chromosome inactivation in patients with X-chromosome rearrangements
Source: PubMed Central journal article supplement (PMC8244138; doi:10.1186/s13148-021-01121-6), 2021-06-30
Supplement: 13148_2021_1121_MOESM6_ESM.pdf [file 13148_2021_1121_MOESM6_ESM.pdf]

**Table S3. The  $\beta$  value in promoter regions of escape genes in the patients.**

| Genomic position | TargetID   | Gene name | Female control     |                   |                   | Patient 1     | Patient 2     | Patient 3     | Patient 4     |
|------------------|------------|-----------|--------------------|-------------------|-------------------|---------------|---------------|---------------|---------------|
|                  |            |           | Mean $\beta$ value | Min $\beta$ value | Max $\beta$ value | $\beta$ value | $\beta$ value | $\beta$ value | $\beta$ value |
| 2847478          | cg05479376 | ARSD      | 0.027              | 0.019             | 0.041             | 0.099         | 0.033         | 0.037         | 0.043         |
| 2847549          | cg01337545 | ARSD      | 0.137              | 0.086             | 0.203             | 0.263         | 0.145         | 0.134         | 0.107         |
| 2847557          | cg21559133 | ARSD      | 0.132              | 0.096             | 0.178             | 0.242         | 0.124         | 0.133         | 0.104         |
| 3264695          | cg16141678 | MXRA5     | 0.095              | 0.060             | 0.140             | 0.334         | 0.117         | 0.157         | 0.151         |
| 3264711          | cg22698358 | MXRA5     | 0.036              | 0.027             | 0.047             | 0.099         | 0.039         | 0.053         | 0.038         |
| 3264725          | cg04371585 | MXRA5     | 0.032              | 0.020             | 0.054             | 0.077         | 0.023         | 0.029         | 0.030         |
| 3264728          | cg23832787 | MXRA5     | 0.040              | 0.025             | 0.069             | 0.129         | 0.044         | 0.059         | 0.047         |
| 3264864          | cg08414231 | MXRA5     | 0.068              | 0.044             | 0.116             | 0.206         | 0.060         | 0.083         | 0.077         |
| 3631387          | cg13879373 | PRKX      | 0.030              | 0.021             | 0.038             | 0.100         | 0.046         | 0.057         | 0.051         |
| 3631575          | cg04065558 | PRKX      | 0.047              | 0.043             | 0.055             | 0.071         | 0.048         | 0.057         | 0.052         |
| 6145096          | cg17811446 | NLGN4X    | 0.091              | 0.059             | 0.121             | 0.159         | 0.086         | 0.128         | 0.115         |
| 6145346          | cg20303283 | NLGN4X    | 0.027              | 0.020             | 0.042             | 0.048         | 0.026         | 0.045         | 0.038         |
| 6145557          | cg21875437 | NLGN4X    | 0.015              | 0.005             | 0.027             | 0.017         | 0.011         | 0.024         | 0.012         |
| 6146608          | cg24103438 | NLGN4X    | 0.066              | 0.049             | 0.088             | 0.156         | 0.072         | 0.092         | 0.069         |
| 6146780          | cg08881159 | NLGN4X    | 0.046              | 0.035             | 0.058             | 0.067         | 0.043         | 0.067         | 0.051         |
| 6147113          | cg15790913 | NLGN4X    | 0.048              | 0.035             | 0.063             | 0.089         | 0.041         | 0.044         | 0.075         |
| 7895590          | cg05508067 | PNPLA4    | 0.041              | 0.021             | 0.086             | 0.222         | 0.067         | 0.061         | 0.056         |
| 7895607          | cg01169463 | PNPLA4    | 0.043              | 0.006             | 0.132             | 0.395         | 0.043         | 0.065         | 0.055         |
| 7895754          | cg01823238 | PNPLA4    | 0.050              | 0.019             | 0.136             | 0.286         | 0.063         | 0.061         | 0.063         |
| 7895900          | cg21864248 | PNPLA4    | 0.118              | 0.099             | 0.168             | 0.183         | 0.116         | 0.175         | 0.109         |
| 8699351          | cg05152051 | KAL1      | 0.053              | 0.034             | 0.065             | 0.136         | 0.081         | 0.078         | 0.076         |
| 8699462          | cg08059058 | KAL1      | 0.071              | 0.044             | 0.123             | 0.163         | 0.055         | 0.071         | 0.063         |
| 8700315          | cg04084455 | KAL1      | 0.033              | 0.019             | 0.063             | 0.105         | 0.027         | 0.048         | 0.036         |
| 8700341          | cg02156712 | KAL1      | 0.024              | 0.013             | 0.033             | 0.066         | 0.025         | 0.032         | 0.025         |
| 8700400          | cg10088365 | KAL1      | 0.038              | 0.019             | 0.062             | 0.191         | 0.047         | 0.055         | 0.052         |
| 8700496          | cg25389127 | KAL1      | 0.048              | 0.036             | 0.073             | 0.111         | 0.054         | 0.047         | 0.051         |
| 13671130         | cg17279959 | TCEANC    | 0.087              | 0.029             | 0.210             | 0.394         | 0.072         | 0.088         | 0.128         |
| 13671259         | cg24882621 | TCEANC    | 0.070              | 0.031             | 0.153             | 0.405         | 0.091         | 0.086         | 0.159         |
| 13671272         | cg16251333 | TCEANC    | 0.072              | 0.029             | 0.183             | 0.344         | 0.069         | 0.070         | 0.073         |
| 13707062         | cg14621531 | RAB9A     | 0.063              | 0.040             | 0.081             | 0.264         | 0.083         | 0.097         | 0.090         |
| 13707135         | cg02723311 | RAB9A     | 0.024              | 0.014             | 0.049             | 0.063         | 0.021         | 0.034         | 0.024         |
| 13707694         | cg02620228 | RAB9A     | 0.100              | 0.051             | 0.149             | 0.260         | 0.201         | 0.176         | 0.173         |
| 13752813         | cg17512860 | TRAPPC2   | 0.081              | 0.051             | 0.172             | 0.331         | 0.081         | 0.128         | 0.086         |
| 13752958         | cg23353205 | TRAPPC2   | 0.042              | 0.029             | 0.068             | 0.175         | 0.064         | 0.079         | 0.045         |
| 13753119         | cg05598468 | TRAPPC2   | 0.081              | 0.051             | 0.191             | 0.186         | 0.037         | 0.089         | 0.040         |
| 13753381         | cg14962776 | TRAPPC2   | 0.049              | 0.029             | 0.067             | 0.185         | 0.053         | 0.084         | 0.085         |

|          |            |         |       |       |       |       |       |       |       |
|----------|------------|---------|-------|-------|-------|-------|-------|-------|-------|
| 13956720 | cg01310267 | GPM6B   | 0.066 | 0.028 | 0.155 | 0.352 | 0.063 | 0.094 | 0.094 |
| 13957159 | cg18776021 | GPM6B   | 0.121 | 0.076 | 0.218 | 0.335 | 0.141 | 0.098 | 0.210 |
| 14047762 | cg19233518 | GEMIN8  | 0.092 | 0.064 | 0.175 | 0.219 | 0.087 | 0.061 | 0.079 |
| 14048019 | cg13675330 | GEMIN8  | 0.031 | 0.016 | 0.076 | 0.189 | 0.036 | 0.031 | 0.028 |
| 14048191 | cg21239691 | GEMIN8  | 0.041 | 0.022 | 0.096 | 0.243 | 0.046 | 0.057 | 0.040 |
| 14048197 | cg07413830 | GEMIN8  | 0.050 | 0.025 | 0.118 | 0.270 | 0.049 | 0.047 | 0.060 |
| 14547320 | cg24596823 | GLRA2   | 0.078 | 0.055 | 0.108 | 0.090 | 0.064 | 0.068 | 0.068 |
| 14547594 | cg03037266 | GLRA2   | 0.122 | 0.083 | 0.151 | 0.305 | 0.166 | 0.198 | 0.198 |
| 15692898 | cg08211022 | CA5BP   | 0.096 | 0.071 | 0.123 | 0.144 | 0.095 | 0.093 | 0.079 |
| 15692909 | cg15926952 | CA5BP   | 0.086 | 0.057 | 0.107 | 0.159 | 0.059 | 0.108 | 0.066 |
| 15693037 | cg10444261 | CA5BP   | 0.036 | 0.024 | 0.049 | 0.123 | 0.043 | 0.030 | 0.032 |
| 15693238 | cg26422761 | CA5BP   | 0.035 | 0.024 | 0.049 | 0.127 | 0.034 | 0.034 | 0.040 |
| 15693836 | cg26816294 | CA5BP   | 0.055 | 0.033 | 0.083 | 0.041 | 0.067 | 0.030 | 0.041 |
| 15693956 | cg22139325 | CA5BP   | 0.039 | 0.026 | 0.050 | 0.120 | 0.040 | 0.044 | 0.044 |
| 15756062 | cg22702707 | CA5B    | 0.097 | 0.072 | 0.117 | 0.152 | 0.082 | 0.116 | 0.093 |
| 15756384 | cg18430208 | CA5B    | 0.036 | 0.029 | 0.044 | 0.133 | 0.086 | 0.105 | 0.073 |
| 15756407 | cg25954223 | CA5B    | 0.061 | 0.049 | 0.076 | 0.111 | 0.048 | 0.067 | 0.063 |
| 15808073 | cg22042328 | ZRSR2   | 0.052 | 0.031 | 0.076 | 0.043 | 0.036 | 0.040 | 0.043 |
| 15808320 | cg13274727 | ZRSR2   | 0.047 | 0.034 | 0.060 | 0.055 | 0.042 | 0.049 | 0.053 |
| 15808408 | cg13552866 | ZRSR2   | 0.043 | 0.034 | 0.054 | 0.050 | 0.056 | 0.045 | 0.045 |
| 15808692 | cg19535369 | ZRSR2   | 0.072 | 0.052 | 0.090 | 0.066 | 0.051 | 0.088 | 0.055 |
| 15872951 | cg17659886 | AP1S2   | 0.033 | 0.025 | 0.044 | 0.060 | 0.039 | 0.038 | 0.057 |
| 15873314 | cg08048775 | AP1S2   | 0.032 | 0.025 | 0.042 | 0.031 | 0.026 | 0.040 | 0.034 |
| 15873337 | cg05106463 | AP1S2   | 0.028 | 0.017 | 0.033 | 0.032 | 0.022 | 0.035 | 0.020 |
| 15873351 | cg05419061 | AP1S2   | 0.019 | 0.014 | 0.025 | 0.034 | 0.028 | 0.016 | 0.026 |
| 15873481 | cg25100404 | AP1S2   | 0.027 | 0.017 | 0.034 | 0.048 | 0.038 | 0.033 | 0.035 |
| 16730380 | cg05572834 | CTPS2   | 0.103 | 0.068 | 0.138 | 0.148 | 0.119 | 0.118 | 0.132 |
| 16730680 | cg07079445 | CTPS2   | 0.061 | 0.047 | 0.070 | 0.079 | 0.066 | 0.057 | 0.069 |
| 16730881 | cg01732428 | CTPS2   | 0.077 | 0.058 | 0.101 | 0.100 | 0.065 | 0.107 | 0.093 |
| 16730923 | cg19388636 | CTPS2   | 0.062 | 0.043 | 0.086 | 0.080 | 0.040 | 0.062 | 0.044 |
| 16737422 | cg22249566 | SYAP1   | 0.096 | 0.069 | 0.120 | 0.149 | 0.107 | 0.151 | 0.084 |
| 16737521 | cg05908833 | SYAP1   | 0.047 | 0.034 | 0.064 | 0.049 | 0.036 | 0.024 | 0.041 |
| 16737621 | cg27351642 | SYAP1   | 0.057 | 0.046 | 0.075 | 0.062 | 0.068 | 0.039 | 0.055 |
| 16737686 | cg25793649 | SYAP1   | 0.028 | 0.020 | 0.040 | 0.025 | 0.030 | 0.035 | 0.032 |
| 16737692 | cg08818886 | SYAP1   | 0.013 | 0.006 | 0.018 | 0.013 | 0.014 | 0.016 | 0.011 |
| 16737800 | cg00331433 | SYAP1   | 0.036 | 0.028 | 0.047 | 0.045 | 0.038 | 0.030 | 0.036 |
| 16804362 | cg27636290 | CXorf15 | 0.031 | 0.024 | 0.040 | 0.033 | 0.022 | 0.041 | 0.020 |
| 16804394 | cg11720142 | CXorf15 | 0.038 | 0.025 | 0.055 | 0.055 | 0.050 | 0.056 | 0.044 |
| 16804461 | cg03348338 | CXorf15 | 0.106 | 0.090 | 0.126 | 0.105 | 0.117 | 0.141 | 0.097 |

|          |            |         |       |       |       |       |       |       |       |
|----------|------------|---------|-------|-------|-------|-------|-------|-------|-------|
| 16804636 | cg22917082 | CXorf15 | 0.037 | 0.021 | 0.048 | 0.048 | 0.039 | 0.037 | 0.045 |
| 20160069 | cg14354749 | EIF1AX  | 0.036 | 0.009 | 0.060 | 0.038 | 0.033 | 0.023 | 0.030 |
| 20160086 | cg22264584 | EIF1AX  | 0.040 | 0.003 | 0.066 | 0.036 | 0.014 | 0.024 | 0.020 |
| 24072448 | cg00914804 | EIF2S3  | 0.050 | 0.031 | 0.120 | 0.093 | 0.039 | 0.050 | 0.050 |
| 24072640 | cg09835024 | EIF2S3  | 0.058 | 0.026 | 0.116 | 0.050 | 0.038 | 0.059 | 0.044 |
| 24167840 | cg07639739 | ZFX     | 0.074 | 0.057 | 0.092 | 0.081 | 0.089 | 0.094 | 0.062 |
| 24168810 | cg03159836 | ZFX     | 0.030 | 0.015 | 0.041 | 0.023 | 0.039 | 0.035 | 0.021 |
| 40506477 | cg24085719 | CXorf38 | 0.055 | 0.026 | 0.131 | 0.036 | 0.067 | 0.029 | 0.106 |
| 40506804 | cg15322570 | CXorf38 | 0.066 | 0.020 | 0.162 | 0.057 | 0.062 | 0.049 | 0.260 |
| 40506974 | cg22148243 | CXorf38 | 0.035 | 0.018 | 0.084 | 0.029 | 0.020 | 0.035 | 0.040 |
| 40506981 | cg03169432 | CXorf38 | 0.023 | 0.017 | 0.031 | 0.029 | 0.035 | 0.027 | 0.037 |
| 41192164 | cg12689375 | DDX3X   | 0.032 | 0.022 | 0.055 | 0.027 | 0.037 | 0.036 | 0.044 |
| 41192872 | cg27042767 | DDX3X   | 0.035 | 0.026 | 0.047 | 0.033 | 0.039 | 0.042 | 0.034 |
| 41193241 | cg11251991 | DDX3X   | 0.030 | 0.023 | 0.039 | 0.056 | 0.060 | 0.039 | 0.056 |
| 41193326 | cg16117744 | DDX3X   | 0.034 | 0.026 | 0.050 | 0.044 | 0.036 | 0.025 | 0.043 |
| 44401762 | cg14084176 | FUNDC1  | 0.057 | 0.039 | 0.081 | 0.070 | 0.077 | 0.064 | 0.120 |
| 44402314 | cg21465470 | FUNDC1  | 0.079 | 0.058 | 0.113 | 0.091 | 0.072 | 0.083 | 0.069 |
| 44402332 | cg01573544 | FUNDC1  | 0.026 | 0.017 | 0.041 | 0.047 | 0.022 | 0.030 | 0.022 |
| 44402383 | cg04565250 | FUNDC1  | 0.048 | 0.018 | 0.119 | 0.089 | 0.045 | 0.052 | 0.051 |
| 44402448 | cg18511445 | FUNDC1  | 0.094 | 0.062 | 0.162 | 0.106 | 0.117 | 0.124 | 0.121 |
| 44731813 | cg15923127 | KDM6A   | 0.032 | 0.025 | 0.045 | 0.032 | 0.023 | 0.044 | 0.027 |
| 44732352 | cg07167981 | KDM6A   | 0.024 | 0.016 | 0.033 | 0.035 | 0.018 | 0.025 | 0.028 |
| 44732417 | cg06877198 | KDM6A   | 0.047 | 0.039 | 0.059 | 0.049 | 0.043 | 0.042 | 0.049 |
| 44732741 | cg24355643 | KDM6A   | 0.017 | 0.006 | 0.026 | 0.019 | 0.025 | 0.010 | 0.021 |
| 44732817 | cg00751785 | KDM6A   | 0.023 | 0.004 | 0.029 | 0.047 | 0.021 | 0.018 | 0.030 |
| 44733206 | cg03267667 | KDM6A   | 0.025 | 0.009 | 0.036 | 0.026 | 0.021 | 0.026 | 0.009 |
| 47050029 | cg25059428 | UBA1    | 0.122 | 0.082 | 0.175 | 0.119 | 0.167 | 0.125 | 0.098 |
| 47050296 | cg22470298 | UBA1    | 0.100 | 0.060 | 0.138 | 0.098 | 0.055 | 0.085 | 0.157 |
| 47053031 | cg03149049 | UBA1    | 0.014 | 0.006 | 0.021 | 0.013 | 0.010 | 0.020 | 0.013 |
| 47053154 | cg08341987 | UBA1    | 0.035 | 0.024 | 0.047 | 0.064 | 0.075 | 0.088 | 0.056 |
| 47053156 | cg22268449 | UBA1    | 0.037 | 0.022 | 0.047 | 0.043 | 0.055 | 0.051 | 0.072 |
| 47053161 | cg17699837 | UBA1    | 0.027 | 0.021 | 0.035 | 0.022 | 0.020 | 0.034 | 0.023 |
| 47053220 | cg06286431 | UBA1    | 0.027 | 0.017 | 0.039 | 0.018 | 0.020 | 0.027 | 0.027 |
| 47077487 | cg13907504 | CDK16   | 0.142 | 0.057 | 0.233 | 0.344 | 0.481 | 0.216 | 0.464 |
| 47077877 | cg11333230 | CDK16   | 0.095 | 0.060 | 0.153 | 0.116 | 0.115 | 0.067 | 0.099 |
| 47077930 | cg23212388 | CDK16   | 0.097 | 0.046 | 0.141 | 0.147 | 0.200 | 0.084 | 0.216 |
| 47077986 | cg22826577 | CDK16   | 0.141 | 0.088 | 0.183 | 0.219 | 0.227 | 0.134 | 0.219 |
| 53254132 | cg09554224 | KDM5C   | 0.037 | 0.028 | 0.048 | 0.036 | 0.036 | 0.050 | 0.035 |
| 53254503 | cg01363850 | KDM5C   | 0.019 | 0.013 | 0.027 | 0.019 | 0.024 | 0.028 | 0.016 |

|           |            |           |       |       |       |       |       |       |       |
|-----------|------------|-----------|-------|-------|-------|-------|-------|-------|-------|
| 53254653  | cg04927982 | KDM5C     | 0.023 | 0.015 | 0.029 | 0.015 | 0.012 | 0.025 | 0.019 |
| 53254760  | cg12234996 | KDM5C     | 0.050 | 0.025 | 0.069 | 0.073 | 0.043 | 0.054 | 0.071 |
| 53350672  | cg11670235 | IQSEC2    | 0.068 | 0.048 | 0.089 | 0.087 | 0.062 | 0.056 | 0.073 |
| 53350693  | cg25849068 | IQSEC2    | 0.043 | 0.021 | 0.082 | 0.100 | 0.044 | 0.063 | 0.074 |
| 53350895  | cg13367883 | IQSEC2    | 0.128 | 0.080 | 0.196 | 0.278 | 0.152 | 0.239 | 0.357 |
| 71496641  | cg06868150 | RPS4X     | 0.057 | 0.035 | 0.076 | 0.032 | 0.035 | 0.036 | 0.029 |
| 71496665  | cg25869832 | RPS4X     | 0.023 | 0.005 | 0.041 | 0.035 | 0.007 | 0.027 | 0.059 |
| 71496701  | cg01714671 | RPS4X     | 0.057 | 0.046 | 0.067 | 0.057 | 0.062 | 0.070 | 0.107 |
| 71497035  | cg08859156 | RPS4X     | 0.045 | 0.038 | 0.057 | 0.032 | 0.040 | 0.043 | 0.066 |
| 71497208  | cg03273228 | RPS4X     | 0.121 | 0.112 | 0.136 | 0.147 | 0.133 | 0.138 | 0.185 |
| 71497224  | cg02546818 | RPS4X     | 0.022 | 0.013 | 0.030 | 0.023 | 0.022 | 0.047 | 0.094 |
| 71497226  | cg27111711 | RPS4X     | 0.077 | 0.066 | 0.092 | 0.079 | 0.078 | 0.064 | 0.048 |
| 73164102  | cg17405188 | LOC554203 | 0.035 | 0.025 | 0.048 | 0.016 | 0.032 | 0.032 | 0.037 |
| 73164228  | cg01752030 | LOC554203 | 0.040 | 0.030 | 0.052 | 0.048 | 0.038 | 0.034 | 0.044 |
| 73164390  | cg09803537 | LOC554203 | 0.054 | 0.040 | 0.071 | 0.053 | 0.043 | 0.072 | 0.065 |
| 153140985 | cg18812946 | L1CAM     | 0.119 | 0.076 | 0.168 | 0.082 | 0.062 | 0.104 | 0.087 |
| 153141270 | cg06300944 | L1CAM     | 0.093 | 0.053 | 0.135 | 0.041 | 0.065 | 0.114 | 0.100 |

A yellow background means probes in duplicated regions. A pale blue background means probes in deleted regions. When the  $\beta$ value is higher than 0.25, the  $\beta$ value is shown in red letters. When more than two consecutive probes'  $\beta$ value within 1,000 bp from TSS of a gene is higher than 0.25, the  $\beta$ value is shown in red bold letters.
