# Supplementary material for: Methylation status of genes escaping from X-chromosome inactivation in patients with X-chromosome rearrangements
Source: PubMed Central journal article supplement (PMC8244138; doi:10.1186/s13148-021-01121-6), 2021-06-30
Supplement: 13148_2021_1121_MOESM7_ESM.pdf [file 13148_2021_1121_MOESM7_ESM.pdf]

**Table S4. The  $\beta$  value in promoter regions of inactivated genes in the patients.**

| Genomic position | TargetID   | Gene name | Male control       |                   | Female             |                   |                   |                        | Patient 1     | Patient 2     | Patient 3     | Patient 4     |
|------------------|------------|-----------|--------------------|-------------------|--------------------|-------------------|-------------------|------------------------|---------------|---------------|---------------|---------------|
|                  |            |           | Mean $\beta$ value | Max $\beta$ value | Mean $\beta$ value | Min $\beta$ value | Max $\beta$ value | Max $\beta$ value+0.05 | $\beta$ value | $\beta$ value | $\beta$ value | $\beta$ value |
| 9983823          | cg00689116 | WWC3      | 0.020              | 0.026             | 0.406              | 0.332             | 0.480             | 0.530                  | 0.549         | 0.497         | 0.349         | 0.369         |
| 9984045          | cg25270201 | WWC3      | 0.077              | 0.138             | 0.409              | 0.311             | 0.512             | 0.562                  | 0.547         | 0.450         | 0.390         | 0.408         |
| 11445762         | cg02969243 | ARHGAP6   | 0.083              | 0.107             | 0.337              | 0.285             | 0.445             | 0.495                  | 0.476         | 0.407         | 0.440         | 0.378         |
| 11446093         | cg08587977 | ARHGAP6   | 0.021              | 0.031             | 0.354              | 0.301             | 0.419             | 0.469                  | 0.539         | 0.367         | 0.375         | 0.474         |
| 11446095         | cg25873934 | ARHGAP6   | 0.026              | 0.031             | 0.419              | 0.371             | 0.494             | 0.544                  | 0.549         | 0.466         | 0.422         | 0.504         |
| 11683131         | cg13868987 | ARHGAP6   | 0.102              | 0.146             | 0.382              | 0.341             | 0.436             | 0.486                  | 0.442         | 0.437         | 0.393         | 0.402         |
| 11683625         | cg18036967 | ARHGAP6   | 0.032              | 0.048             | 0.367              | 0.305             | 0.440             | 0.490                  | 0.468         | 0.400         | 0.322         | 0.346         |
| 11683838         | cg23783361 | ARHGAP6   | 0.080              | 0.100             | 0.413              | 0.374             | 0.463             | 0.513                  | 0.497         | 0.404         | 0.386         | 0.438         |
| 11683977         | cg07828380 | ARHGAP6   | 0.128              | 0.147             | 0.460              | 0.416             | 0.504             | 0.554                  | 0.524         | 0.498         | 0.488         | 0.474         |
| 12809100         | cg27325673 | PRPS2     | 0.026              | 0.050             | 0.414              | 0.335             | 0.522             | 0.572                  | 0.599         | 0.499         | 0.433         | 0.511         |
| 12809173         | cg26190455 | PRPS2     | 0.016              | 0.024             | 0.384              | 0.330             | 0.455             | 0.505                  | 0.471         | 0.388         | 0.339         | 0.421         |
| 12809328         | cg01669374 | PRPS2     | 0.062              | 0.106             | 0.392              | 0.281             | 0.531             | 0.581                  | 0.552         | 0.351         | 0.449         | 0.474         |
| 12809589         | cg18492262 | PRPS2     | 0.044              | 0.055             | 0.342              | 0.264             | 0.447             | 0.497                  | 0.479         | 0.311         | 0.305         | 0.377         |
| 15353857         | cg12194828 | PIGA      | 0.048              | 0.059             | 0.405              | 0.343             | 0.471             | 0.521                  | 0.467         | 0.320         | 0.376         | 0.382         |
| 15353925         | cg05275343 | PIGA      | 0.031              | 0.043             | 0.376              | 0.326             | 0.434             | 0.484                  | 0.549         | 0.393         | 0.411         | 0.476         |
| 18372126         | cg09799350 | SCML2     | 0.027              | 0.033             | 0.422              | 0.326             | 0.497             | 0.547                  | 0.458         | 0.408         | 0.360         | 0.485         |
| 18372963         | cg08300622 | SCML2     | 0.034              | 0.046             | 0.464              | 0.399             | 0.537             | 0.587                  | 0.474         | 0.470         | 0.411         | 0.529         |
| 21392324         | cg05444994 | CNKSR2    | 0.034              | 0.045             | 0.458              | 0.369             | 0.531             | 0.581                  | 0.537         | 0.451         | 0.475         | 0.452         |
| 21392334         | cg13616735 | CNKSR2    | 0.026              | 0.033             | 0.393              | 0.333             | 0.442             | 0.492                  | 0.486         | 0.393         | 0.403         | 0.431         |
| 21392642         | cg19807373 | CNKSR2    | 0.019              | 0.025             | 0.416              | 0.350             | 0.476             | 0.526                  | 0.492         | 0.430         | 0.408         | 0.445         |
| 21392644         | cg09252204 | CNKSR2    | 0.022              | 0.031             | 0.382              | 0.283             | 0.465             | 0.515                  | 0.433         | 0.379         | 0.334         | 0.374         |
| 21392988         | cg26267038 | CNKSR2    | 0.057              | 0.072             | 0.455              | 0.377             | 0.511             | 0.561                  | 0.514         | 0.459         | 0.526         | 0.517         |
| 21393306         | cg05747459 | CNKSR2    | 0.105              | 0.140             | 0.439              | 0.382             | 0.519             | 0.569                  | 0.499         | 0.473         | 0.366         | 0.523         |
| 23761589         | cg26207017 | ACOT9     | 0.027              | 0.033             | 0.401              | 0.343             | 0.480             | 0.530                  | 0.380         | 0.368         | 0.347         | 0.417         |
| 23761651         | cg24123780 | ACOT9     | 0.074              | 0.111             | 0.442              | 0.368             | 0.499             | 0.549                  | 0.433         | 0.486         | 0.429         | 0.412         |
| 23761736         | cg08289016 | ACOT9     | 0.133              | 0.174             | 0.458              | 0.395             | 0.525             | 0.575                  | 0.413         | 0.465         | 0.405         | 0.413         |
| 23801440         | cg09725439 | SAT1      | 0.021              | 0.027             | 0.430              | 0.380             | 0.475             | 0.525                  | 0.420         | 0.386         | 0.479         | 0.403         |
| 23801656         | cg14550383 | SAT1      | 0.060              | 0.081             | 0.473              | 0.392             | 0.525             | 0.575                  | 0.582         | 0.476         | 0.501         | 0.532         |
| 24665506         | cg15259889 | PCYT1B    | 0.022              | 0.034             | 0.346              | 0.273             | 0.380             | 0.430                  | 0.474         | 0.437         | 0.422         | 0.456         |
| 24665508         | cg17627526 | PCYT1B    | 0.023              | 0.032             | 0.344              | 0.309             | 0.381             | 0.431                  | 0.439         | 0.403         | 0.367         | 0.388         |
| 24665655         | cg21337832 | PCYT1B    | 0.047              | 0.065             | 0.419              | 0.357             | 0.480             | 0.530                  | 0.463         | 0.535         | 0.482         | 0.455         |
| 30326676         | cg00040455 | NR0B1     | 0.078              | 0.118             | 0.387              | 0.330             | 0.472             | 0.522                  | 0.447         | 0.378         | 0.466         | 0.345         |
| 30327110         | cg11869614 | NR0B1     | 0.053              | 0.070             | 0.499              | 0.453             | 0.565             | 0.615                  | 0.574         | 0.540         | 0.632         | 0.591         |
| 30327487         | cg23208903 | NR0B1     | 0.071              | 0.086             | 0.444              | 0.388             | 0.517             | 0.567                  | 0.450         | 0.422         | 0.415         | 0.455         |
| 30327545         | cg07820420 | NR0B1     | 0.083              | 0.117             | 0.324              | 0.289             | 0.388             | 0.438                  | 0.406         | 0.264         | 0.351         | 0.372         |
| 30327547         | cg13012525 | NR0B1     | 0.091              | 0.113             | 0.381              | 0.324             | 0.448             | 0.498                  | 0.425         | 0.381         | 0.358         | 0.450         |
| 30327615         | cg10291990 | NR0B1     | 0.047              | 0.059             | 0.429              | 0.367             | 0.469             | 0.519                  | 0.458         | 0.394         | 0.469         | 0.436         |
| 30906902         | cg09319393 | MAP3K7IP3 | 0.052              | 0.069             | 0.397              | 0.358             | 0.439             | 0.489                  | 0.427         | 0.397         | 0.400         | 0.350         |
| 30907117         | cg20372745 | MAP3K7IP3 | 0.042              | 0.052             | 0.455              | 0.362             | 0.509             | 0.559                  | 0.543         | 0.436         | 0.485         | 0.445         |
| 30907598         | cg25416923 | MAP3K7IP3 | 0.070              | 0.102             | 0.338              | 0.298             | 0.371             | 0.421                  | 0.433         | 0.284         | 0.372         | 0.333         |
| 37430711         | cg02166322 | LANCL3    | 0.029              | 0.043             | 0.370              | 0.295             | 0.416             | 0.466                  | 0.391         | 0.368         | 0.363         | 0.413         |
| 37430889         | cg21882403 | LANCL3    | 0.049              | 0.063             | 0.459              | 0.414             | 0.493             | 0.543                  | 0.512         | 0.393         | 0.427         | 0.439         |
| 41781902         | cg09815801 | CASK      | 0.024              | 0.033             | 0.421              | 0.319             | 0.470             | 0.520                  | 0.076         | 0.362         | 0.380         | 0.370         |
| 41782111         | cg14622782 | CASK      | 0.069              | 0.114             | 0.345              | 0.270             | 0.436             | 0.486                  | 0.079         | 0.247         | 0.250         | 0.232         |
| 41782322         | cg17548613 | CASK      | 0.101              | 0.135             | 0.465              | 0.360             | 0.537             | 0.587                  | 0.136         | 0.497         | 0.436         | 0.401         |

|          |            |          |       |       |       |       |       |       |       |       |       |       |
|----------|------------|----------|-------|-------|-------|-------|-------|-------|-------|-------|-------|-------|
| 41782695 | cg03983969 | CASK     | 0.024 | 0.035 | 0.473 | 0.420 | 0.534 | 0.584 | 0.086 | 0.412 | 0.436 | 0.430 |
| 47004051 | cg02165720 | NDUFB11  | 0.026 | 0.046 | 0.491 | 0.444 | 0.560 | 0.610 | 0.500 | 0.496 | 0.487 | 0.604 |
| 47004107 | cg05418506 | NDUFB11  | 0.016 | 0.024 | 0.458 | 0.394 | 0.516 | 0.566 | 0.467 | 0.356 | 0.459 | 0.448 |
| 47004146 | cg02538330 | NDUFB11  | 0.021 | 0.029 | 0.426 | 0.327 | 0.495 | 0.545 | 0.433 | 0.423 | 0.442 | 0.373 |
| 47341898 | cg02124059 | ZNF41    | 0.120 | 0.150 | 0.499 | 0.442 | 0.540 | 0.590 | 0.490 | 0.474 | 0.596 | 0.435 |
| 47342108 | cg09020104 | ZNF41    | 0.016 | 0.022 | 0.313 | 0.263 | 0.368 | 0.418 | 0.358 | 0.301 | 0.335 | 0.337 |
| 47342124 | cg05526804 | ZNF41    | 0.023 | 0.034 | 0.357 | 0.318 | 0.435 | 0.485 | 0.391 | 0.349 | 0.479 | 0.363 |
| 47441581 | cg02896361 | SYN1     | 0.080 | 0.107 | 0.447 | 0.389 | 0.506 | 0.556 | 0.439 | 0.402 | 0.401 | 0.434 |
| 47441605 | cg18009325 | SYN1     | 0.092 | 0.114 | 0.384 | 0.314 | 0.463 | 0.513 | 0.430 | 0.325 | 0.418 | 0.361 |
| 47695826 | cg19580826 | ZNF81    | 0.075 | 0.098 | 0.439 | 0.394 | 0.474 | 0.524 | 0.472 | 0.384 | 0.487 | 0.399 |
| 47695967 | cg11773570 | ZNF81    | 0.027 | 0.042 | 0.404 | 0.358 | 0.454 | 0.504 | 0.357 | 0.334 | 0.496 | 0.377 |
| 48367193 | cg08785133 | PORCN    | 0.044 | 0.050 | 0.468 | 0.412 | 0.514 | 0.564 | 0.551 | 0.471 | 0.557 | 0.443 |
| 48367513 | cg03244432 | PORCN    | 0.018 | 0.025 | 0.372 | 0.308 | 0.410 | 0.460 | 0.382 | 0.373 | 0.384 | 0.292 |
| 48755154 | cg27403913 | PQBP1    | 0.020 | 0.024 | 0.401 | 0.338 | 0.481 | 0.531 | 0.475 | 0.405 | 0.417 | 0.444 |
| 48755433 | cg21364772 | PQBP1    | 0.034 | 0.046 | 0.383 | 0.351 | 0.417 | 0.467 | 0.316 | 0.306 | 0.379 | 0.269 |
| 48769307 | cg01488378 | SLC35A2  | 0.041 | 0.054 | 0.426 | 0.351 | 0.532 | 0.582 | 0.531 | 0.394 | 0.448 | 0.427 |
| 48769370 | cg14132995 | SLC35A2  | 0.044 | 0.067 | 0.376 | 0.302 | 0.483 | 0.533 | 0.374 | 0.337 | 0.393 | 0.325 |
| 48776349 | cg03692228 | PIM2     | 0.029 | 0.039 | 0.379 | 0.298 | 0.457 | 0.507 | 0.457 | 0.431 | 0.369 | 0.367 |
| 48776465 | cg17192356 | PIM2     | 0.061 | 0.090 | 0.400 | 0.307 | 0.471 | 0.521 | 0.488 | 0.352 | 0.482 | 0.365 |
| 48776567 | cg12888005 | PIM2     | 0.055 | 0.103 | 0.492 | 0.450 | 0.560 | 0.610 | 0.473 | 0.436 | 0.616 | 0.529 |
| 48776812 | cg21267792 | PIM2     | 0.034 | 0.046 | 0.379 | 0.285 | 0.449 | 0.499 | 0.439 | 0.397 | 0.469 | 0.490 |
| 48815581 | cg03835117 | OTUD5    | 0.030 | 0.040 | 0.343 | 0.286 | 0.390 | 0.440 | 0.387 | 0.325 | 0.412 | 0.436 |
| 48815643 | cg12591117 | OTUD5    | 0.056 | 0.111 | 0.395 | 0.316 | 0.459 | 0.509 | 0.613 | 0.452 | 0.470 | 0.446 |
| 48815856 | cg02480419 | OTUD5    | 0.037 | 0.055 | 0.481 | 0.413 | 0.531 | 0.581 | 0.497 | 0.470 | 0.555 | 0.448 |
| 48828399 | cg03341064 | KCND1    | 0.083 | 0.131 | 0.437 | 0.377 | 0.486 | 0.536 | 0.512 | 0.423 | 0.384 | 0.409 |
| 48828779 | cg25676950 | KCND1    | 0.028 | 0.038 | 0.379 | 0.320 | 0.434 | 0.484 | 0.367 | 0.382 | 0.341 | 0.479 |
| 48858660 | cg16930349 | GRIPAP1  | 0.103 | 0.135 | 0.408 | 0.329 | 0.479 | 0.529 | 0.424 | 0.348 | 0.410 | 0.383 |
| 48858679 | cg04703500 | GRIPAP1  | 0.044 | 0.061 | 0.461 | 0.392 | 0.511 | 0.561 | 0.466 | 0.385 | 0.491 | 0.438 |
| 48858686 | cg13443410 | GRIPAP1  | 0.040 | 0.066 | 0.481 | 0.397 | 0.583 | 0.633 | 0.473 | 0.423 | 0.506 | 0.389 |
| 48858832 | cg15392343 | GRIPAP1  | 0.043 | 0.053 | 0.462 | 0.396 | 0.499 | 0.549 | 0.476 | 0.367 | 0.478 | 0.381 |
| 48931388 | cg20371650 | PRAF2    | 0.028 | 0.037 | 0.443 | 0.391 | 0.505 | 0.555 | 0.451 | 0.467 | 0.572 | 0.464 |
| 48931623 | cg11286196 | PRAF2    | 0.031 | 0.040 | 0.413 | 0.377 | 0.446 | 0.496 | 0.436 | 0.379 | 0.479 | 0.411 |
| 48980043 | cg01150083 | GPKOW    | 0.046 | 0.057 | 0.454 | 0.364 | 0.512 | 0.562 | 0.436 | 0.422 | 0.424 | 0.311 |
| 48980092 | cg07240096 | GPKOW    | 0.028 | 0.038 | 0.425 | 0.360 | 0.492 | 0.542 | 0.481 | 0.407 | 0.499 | 0.482 |
| 49028673 | cg17878135 | PLP2     | 0.030 | 0.043 | 0.420 | 0.346 | 0.548 | 0.598 | 0.490 | 0.476 | 0.508 | 0.488 |
| 49029104 | cg07210835 | PLP2     | 0.093 | 0.126 | 0.435 | 0.367 | 0.525 | 0.575 | 0.453 | 0.341 | 0.508 | 0.427 |
| 49687306 | cg00264378 | CLCN5    | 0.025 | 0.037 | 0.468 | 0.427 | 0.524 | 0.574 | 0.545 | 0.435 | 0.512 | 0.483 |
| 49687331 | cg21911363 | CLCN5    | 0.033 | 0.048 | 0.428 | 0.385 | 0.468 | 0.518 | 0.470 | 0.425 | 0.515 | 0.439 |
| 50557114 | cg22750156 | SHROOM4  | 0.035 | 0.045 | 0.471 | 0.426 | 0.514 | 0.564 | 0.507 | 0.485 | 0.434 | 0.492 |
| 50557436 | cg05145435 | SHROOM4  | 0.088 | 0.120 | 0.415 | 0.358 | 0.497 | 0.547 | 0.408 | 0.460 | 0.422 | 0.508 |
| 51075046 | cg00648125 | NUDT10   | 0.064 | 0.088 | 0.447 | 0.400 | 0.513 | 0.563 | 0.645 | 0.666 | 0.557 | 0.658 |
| 51075126 | cg02975846 | NUDT10   | 0.075 | 0.103 | 0.344 | 0.292 | 0.453 | 0.503 | 0.320 | 0.254 | 0.323 | 0.409 |
| 51075273 | cg20430749 | NUDT10   | 0.064 | 0.087 | 0.384 | 0.337 | 0.427 | 0.477 | 0.418 | 0.366 | 0.447 | 0.397 |
| 51546668 | cg01195014 | MAGED1   | 0.050 | 0.082 | 0.449 | 0.352 | 0.497 | 0.547 | 0.464 | 0.382 | 0.373 | 0.403 |
| 51636568 | cg00597858 | MAGED1   | 0.027 | 0.038 | 0.345 | 0.307 | 0.397 | 0.447 | 0.393 | 0.257 | 0.318 | 0.341 |
| 51636629 | cg03742148 | MAGED1   | 0.034 | 0.057 | 0.366 | 0.276 | 0.420 | 0.470 | 0.396 | 0.342 | 0.279 | 0.376 |
| 53461213 | cg04241572 | HSD17B10 | 0.028 | 0.040 | 0.328 | 0.272 | 0.416 | 0.466 | 0.402 | 0.299 | 0.296 | 0.435 |
| 53461386 | cg26323797 | HSD17B10 | 0.128 | 0.158 | 0.485 | 0.381 | 0.586 | 0.636 | 0.624 | 0.406 | 0.463 | 0.540 |

|          |            |          |       |       |       |       |       |       |       |       |       |       |
|----------|------------|----------|-------|-------|-------|-------|-------|-------|-------|-------|-------|-------|
| 54069630 | cg23245763 | PHF8     | 0.041 | 0.068 | 0.420 | 0.298 | 0.526 | 0.576 | 0.624 | 0.467 | 0.555 | 0.403 |
| 54069785 | cg01961587 | PHF8     | 0.040 | 0.052 | 0.430 | 0.379 | 0.501 | 0.551 | 0.376 | 0.396 | 0.499 | 0.532 |
| 54069813 | cg18626978 | PHF8     | 0.018 | 0.027 | 0.384 | 0.311 | 0.468 | 0.518 | 0.378 | 0.344 | 0.365 | 0.490 |
| 54209709 | cg04326875 | FAM120C  | 0.041 | 0.057 | 0.417 | 0.368 | 0.500 | 0.550 | 0.433 | 0.393 | 0.519 | 0.369 |
| 54209920 | cg13183496 | FAM120C  | 0.025 | 0.032 | 0.471 | 0.411 | 0.518 | 0.568 | 0.516 | 0.423 | 0.560 | 0.474 |
| 54384161 | cg15048430 | WNK3     | 0.053 | 0.061 | 0.442 | 0.378 | 0.500 | 0.550 | 0.486 | 0.422 | 0.423 | 0.442 |
| 54384719 | cg16235803 | WNK3     | 0.038 | 0.053 | 0.403 | 0.311 | 0.497 | 0.547 | 0.464 | 0.389 | 0.552 | 0.502 |
| 54384964 | cg12707233 | WNK3     | 0.044 | 0.059 | 0.459 | 0.413 | 0.508 | 0.558 | 0.431 | 0.462 | 0.556 | 0.538 |
| 54385394 | cg02896496 | WNK3     | 0.019 | 0.028 | 0.455 | 0.420 | 0.502 | 0.552 | 0.535 | 0.502 | 0.513 | 0.468 |
| 54834292 | cg07767690 | MAGED2   | 0.016 | 0.021 | 0.414 | 0.380 | 0.473 | 0.523 | 0.350 | 0.431 | 0.458 | 0.410 |
| 54835315 | cg22674664 | MAGED2   | 0.041 | 0.046 | 0.487 | 0.426 | 0.552 | 0.602 | 0.505 | 0.483 | 0.599 | 0.476 |
| 54835382 | cg22660483 | MAGED2   | 0.039 | 0.059 | 0.478 | 0.418 | 0.537 | 0.587 | 0.479 | 0.404 | 0.557 | 0.574 |
| 54947373 | cg06942445 | TRO      | 0.027 | 0.038 | 0.396 | 0.352 | 0.445 | 0.495 | 0.385 | 0.345 | 0.422 | 0.371 |
| 54947822 | cg23360535 | TRO      | 0.048 | 0.066 | 0.436 | 0.391 | 0.474 | 0.524 | 0.413 | 0.384 | 0.443 | 0.484 |
| 55026485 | cg05961595 | APEX2    | 0.024 | 0.032 | 0.360 | 0.297 | 0.413 | 0.463 | 0.423 | 0.323 | 0.386 | 0.391 |
| 55026807 | cg26927606 | APEX2    | 0.041 | 0.050 | 0.483 | 0.441 | 0.521 | 0.571 | 0.498 | 0.470 | 0.550 | 0.485 |
| 55026811 | cg13311758 | APEX2    | 0.036 | 0.049 | 0.461 | 0.422 | 0.505 | 0.555 | 0.442 | 0.434 | 0.518 | 0.406 |
| 55478180 | cg18869368 | MAGEH1   | 0.040 | 0.057 | 0.338 | 0.271 | 0.428 | 0.478 | 0.317 | 0.327 | 0.393 | 0.261 |
| 55478329 | cg04029630 | MAGEH1   | 0.032 | 0.048 | 0.471 | 0.386 | 0.508 | 0.558 | 0.599 | 0.521 | 0.643 | 0.585 |
| 55515653 | cg00834229 | USP51    | 0.032 | 0.046 | 0.399 | 0.350 | 0.487 | 0.537 | 0.493 | 0.347 | 0.537 | 0.502 |
| 55515720 | cg01084827 | USP51    | 0.060 | 0.081 | 0.356 | 0.290 | 0.417 | 0.467 | 0.449 | 0.400 | 0.481 | 0.462 |
| 56258808 | cg22829182 | KLF8     | 0.033 | 0.050 | 0.371 | 0.319 | 0.427 | 0.477 | 0.404 | 0.390 | 0.450 | 0.570 |
| 56259040 | cg03610137 | KLF8     | 0.036 | 0.048 | 0.439 | 0.397 | 0.481 | 0.531 | 0.483 | 0.423 | 0.527 | 0.430 |
| 57937045 | cg25930738 | ZXDA     | 0.036 | 0.048 | 0.371 | 0.327 | 0.415 | 0.465 | 0.333 | 0.269 | 0.390 | 0.250 |
| 57937143 | cg09249608 | ZXDA     | 0.106 | 0.166 | 0.444 | 0.371 | 0.578 | 0.628 | 0.296 | 0.293 | 0.489 | 0.307 |
| 62570990 | cg09070199 | SPIN4    | 0.020 | 0.026 | 0.436 | 0.320 | 0.507 | 0.557 | 0.441 | 0.417 | 0.515 | 0.331 |
| 62571359 | cg09022442 | SPIN4    | 0.015 | 0.022 | 0.419 | 0.360 | 0.500 | 0.550 | 0.489 | 0.424 | 0.468 | 0.373 |
| 62780753 | cg18625305 | LOC92249 | 0.031 | 0.040 | 0.356 | 0.274 | 0.428 | 0.478 | 0.344 | 0.330 | 0.489 | 0.313 |
| 62780793 | cg16956903 | LOC92249 | 0.062 | 0.087 | 0.349 | 0.281 | 0.447 | 0.497 | 0.353 | 0.252 | 0.341 | 0.249 |
| 62780844 | cg05375065 | LOC92249 | 0.050 | 0.064 | 0.485 | 0.416 | 0.595 | 0.645 | 0.473 | 0.418 | 0.430 | 0.365 |
| 62780853 | cg14314451 | LOC92249 | 0.029 | 0.038 | 0.475 | 0.438 | 0.523 | 0.573 | 0.481 | 0.448 | 0.544 | 0.417 |
| 62975065 | cg00727483 | ARHGEF9  | 0.021 | 0.029 | 0.443 | 0.365 | 0.523 | 0.573 | 0.473 | 0.454 | 0.551 | 0.343 |
| 62975151 | cg15917786 | ARHGEF9  | 0.027 | 0.038 | 0.425 | 0.363 | 0.479 | 0.529 | 0.392 | 0.370 | 0.413 | 0.452 |
| 62975162 | cg13489005 | ARHGEF9  | 0.020 | 0.024 | 0.439 | 0.371 | 0.499 | 0.549 | 0.469 | 0.389 | 0.461 | 0.491 |
| 64196367 | cg06327799 | ZC4H2    | 0.042 | 0.058 | 0.331 | 0.276 | 0.434 | 0.484 | 0.325 | 0.301 | 0.315 | 0.379 |
| 64196429 | cg16359563 | ZC4H2    | 0.037 | 0.045 | 0.322 | 0.283 | 0.376 | 0.426 | 0.289 | 0.383 | 0.287 | 0.365 |
| 64196642 | cg27326620 | ZC4H2    | 0.101 | 0.137 | 0.391 | 0.299 | 0.501 | 0.551 | 0.437 | 0.357 | 0.516 | 0.434 |
| 64196751 | cg11049305 | ZC4H2    | 0.052 | 0.061 | 0.361 | 0.277 | 0.444 | 0.494 | 0.336 | 0.367 | 0.341 | 0.328 |
| 64754624 | cg17299883 | LAS1L    | 0.061 | 0.094 | 0.435 | 0.340 | 0.562 | 0.612 | 0.433 | 0.289 | 0.384 | 0.289 |
| 64754863 | cg17001703 | LAS1L    | 0.037 | 0.043 | 0.498 | 0.458 | 0.543 | 0.593 | 0.517 | 0.480 | 0.581 | 0.557 |
| 66763696 | cg19102572 | AR       | 0.070 | 0.088 | 0.392 | 0.352 | 0.433 | 0.483 | 0.368 | 0.338 | 0.363 | 0.331 |
| 66764000 | cg16679837 | AR       | 0.083 | 0.114 | 0.481 | 0.406 | 0.556 | 0.606 | 0.510 | 0.468 | 0.411 | 0.353 |
| 67718493 | cg12039967 | YIPF6    | 0.035 | 0.050 | 0.465 | 0.426 | 0.515 | 0.565 | 0.526 | 0.534 | 0.587 | 0.495 |
| 67718700 | cg03939693 | YIPF6    | 0.027 | 0.040 | 0.343 | 0.270 | 0.415 | 0.465 | 0.350 | 0.414 | 0.300 | 0.310 |
| 67718716 | cg17203703 | YIPF6    | 0.051 | 0.079 | 0.470 | 0.385 | 0.598 | 0.648 | 0.582 | 0.422 | 0.436 | 0.372 |
| 67718729 | cg19605909 | YIPF6    | 0.079 | 0.105 | 0.469 | 0.433 | 0.538 | 0.588 | 0.529 | 0.428 | 0.459 | 0.442 |
| 67913300 | cg08728127 | STARD8   | 0.113 | 0.155 | 0.331 | 0.294 | 0.387 | 0.437 | 0.391 | 0.269 | 0.352 | 0.264 |
| 67913327 | cg24149051 | STARD8   | 0.104 | 0.142 | 0.392 | 0.328 | 0.450 | 0.500 | 0.450 | 0.435 | 0.466 | 0.361 |

|           |            |          |       |       |       |       |       |       |       |       |       |       |
|-----------|------------|----------|-------|-------|-------|-------|-------|-------|-------|-------|-------|-------|
| 68836202  | cg12137402 | EDA      | 0.026 | 0.033 | 0.476 | 0.421 | 0.528 | 0.578 | 0.517 | 0.505 | 0.489 | 0.437 |
| 68836571  | cg06126323 | EDA      | 0.072 | 0.093 | 0.414 | 0.345 | 0.500 | 0.550 | 0.492 | 0.404 | 0.526 | 0.479 |
| 69664482  | cg20051589 | DLG3     | 0.072 | 0.101 | 0.311 | 0.269 | 0.378 | 0.428 | 0.325 | 0.309 | 0.189 | 0.252 |
| 69664580  | cg24658899 | DLG3     | 0.059 | 0.072 | 0.418 | 0.349 | 0.478 | 0.528 | 0.464 | 0.362 | 0.288 | 0.410 |
| 69664599  | cg03894002 | DLG3     | 0.076 | 0.099 | 0.467 | 0.438 | 0.523 | 0.573 | 0.502 | 0.423 | 0.447 | 0.478 |
| 69664757  | cg16394734 | DLG3     | 0.130 | 0.145 | 0.485 | 0.459 | 0.523 | 0.573 | 0.504 | 0.488 | 0.440 | 0.436 |
| 69665118  | cg23429746 | DLG3     | 0.041 | 0.060 | 0.430 | 0.375 | 0.481 | 0.531 | 0.442 | 0.419 | 0.477 | 0.404 |
| 70150722  | cg10801213 | SLC7A3   | 0.026 | 0.033 | 0.418 | 0.336 | 0.487 | 0.537 | 0.456 | 0.480 | 0.484 | 0.531 |
| 70150787  | cg11024449 | SLC7A3   | 0.059 | 0.077 | 0.486 | 0.412 | 0.537 | 0.587 | 0.524 | 0.479 | 0.502 | 0.480 |
| 70338337  | cg14961988 | MED12    | 0.023 | 0.029 | 0.290 | 0.251 | 0.341 | 0.391 | 0.332 | 0.222 | 0.253 | 0.232 |
| 70338656  | cg05511752 | MED12    | 0.039 | 0.051 | 0.499 | 0.442 | 0.587 | 0.637 | 0.613 | 0.479 | 0.492 | 0.450 |
| 70473981  | cg17603461 | ZMYM3    | 0.023 | 0.044 | 0.380 | 0.294 | 0.441 | 0.491 | 0.403 | 0.313 | 0.359 | 0.398 |
| 70474085  | cg26764972 | ZMYM3    | 0.053 | 0.061 | 0.498 | 0.445 | 0.551 | 0.601 | 0.540 | 0.458 | 0.497 | 0.521 |
| 70474095  | cg24770638 | ZMYM3    | 0.051 | 0.066 | 0.478 | 0.445 | 0.526 | 0.576 | 0.533 | 0.481 | 0.441 | 0.559 |
| 70474110  | cg21474854 | ZMYM3    | 0.039 | 0.044 | 0.438 | 0.415 | 0.459 | 0.509 | 0.485 | 0.450 | 0.386 | 0.477 |
| 70474172  | cg25226891 | ZMYM3    | 0.042 | 0.059 | 0.405 | 0.346 | 0.493 | 0.543 | 0.517 | 0.414 | 0.386 | 0.369 |
| 70752659  | cg09006810 | OGT      | 0.029 | 0.048 | 0.339 | 0.289 | 0.415 | 0.465 | 0.354 | 0.337 | 0.433 | 0.274 |
| 70752808  | cg16809091 | OGT      | 0.029 | 0.037 | 0.351 | 0.282 | 0.417 | 0.467 | 0.390 | 0.323 | 0.432 | 0.349 |
| 71459039  | cg07056550 | ERCC6L   | 0.027 | 0.038 | 0.296 | 0.266 | 0.313 | 0.363 | 0.365 | 0.279 | 0.346 | 0.326 |
| 71459115  | cg05279113 | ERCC6L   | 0.036 | 0.048 | 0.471 | 0.430 | 0.528 | 0.578 | 0.513 | 0.450 | 0.458 | 0.460 |
| 71459119  | cg12689022 | ERCC6L   | 0.046 | 0.063 | 0.384 | 0.327 | 0.429 | 0.479 | 0.393 | 0.337 | 0.347 | 0.435 |
| 71793016  | cg23472592 | HDAC8    | 0.144 | 0.206 | 0.404 | 0.330 | 0.457 | 0.507 | 0.397 | 0.363 | 0.409 | 0.332 |
| 71793049  | cg12234922 | HDAC8    | 0.060 | 0.078 | 0.429 | 0.353 | 0.511 | 0.561 | 0.406 | 0.281 | 0.370 | 0.383 |
| 74144469  | cg10078687 | KIAA2022 | 0.067 | 0.074 | 0.447 | 0.419 | 0.472 | 0.522 | 0.461 | 0.468 | 0.456 | 0.473 |
| 74145215  | cg15028497 | KIAA2022 | 0.029 | 0.034 | 0.392 | 0.341 | 0.445 | 0.495 | 0.354 | 0.338 | 0.387 | 0.436 |
| 74376241  | cg11340371 | ABCB7    | 0.067 | 0.102 | 0.450 | 0.378 | 0.552 | 0.602 | 0.478 | 0.469 | 0.602 | 0.398 |
| 74376313  | cg27419400 | ABCB7    | 0.049 | 0.074 | 0.391 | 0.319 | 0.459 | 0.509 | 0.316 | 0.277 | 0.403 | 0.418 |
| 74743466  | cg03353482 | ZDHHC15  | 0.080 | 0.100 | 0.408 | 0.335 | 0.481 | 0.531 | 0.461 | 0.422 | 0.461 | 0.391 |
| 74743480  | cg17509494 | ZDHHC15  | 0.083 | 0.134 | 0.430 | 0.377 | 0.494 | 0.544 | 0.427 | 0.368 | 0.426 | 0.493 |
| 77041452  | cg14061423 | ATRX     | 0.076 | 0.089 | 0.375 | 0.286 | 0.436 | 0.486 | 0.306 | 0.343 | 0.391 | 0.299 |
| 77041745  | cg12857702 | ATRX     | 0.025 | 0.042 | 0.429 | 0.339 | 0.503 | 0.553 | 0.548 | 0.436 | 0.609 | 0.494 |
| 77041828  | cg03661529 | ATRX     | 0.030 | 0.042 | 0.465 | 0.393 | 0.512 | 0.562 | 0.494 | 0.445 | 0.525 | 0.472 |
| 77041832  | cg00743068 | ATRX     | 0.030 | 0.045 | 0.443 | 0.382 | 0.496 | 0.546 | 0.452 | 0.386 | 0.500 | 0.436 |
| 77041835  | cg21889537 | ATRX     | 0.018 | 0.032 | 0.334 | 0.275 | 0.435 | 0.485 | 0.315 | 0.341 | 0.283 | 0.391 |
| 77151319  | cg02530767 | MAGT1    | 0.044 | 0.071 | 0.496 | 0.421 | 0.601 | 0.651 | 0.555 | 0.471 | 0.510 | 0.522 |
| 77151529  | cg23241240 | MAGT1    | 0.081 | 0.121 | 0.491 | 0.428 | 0.570 | 0.620 | 0.550 | 0.450 | 0.679 | 0.484 |
| 83443097  | cg26511293 | RPS6KA6  | 0.066 | 0.094 | 0.341 | 0.302 | 0.421 | 0.471 | 0.341 | 0.285 | 0.379 | 0.421 |
| 83443104  | cg08642787 | RPS6KA6  | 0.051 | 0.062 | 0.417 | 0.365 | 0.464 | 0.514 | 0.489 | 0.416 | 0.539 | 0.469 |
| 99986436  | cg27260927 | SYTL4    | 0.091 | 0.116 | 0.422 | 0.362 | 0.448 | 0.498 | 0.519 | 0.442 | 0.456 | 0.488 |
| 99986526  | cg17474263 | SYTL4    | 0.043 | 0.058 | 0.400 | 0.350 | 0.445 | 0.495 | 0.512 | 0.367 | 0.377 | 0.336 |
| 100877773 | cg09251061 | ARMCX3   | 0.043 | 0.056 | 0.333 | 0.279 | 0.418 | 0.468 | 0.384 | 0.322 | 0.478 | 0.397 |
| 100878107 | cg06900776 | ARMCX3   | 0.041 | 0.053 | 0.324 | 0.268 | 0.371 | 0.421 | 0.385 | 0.362 | 0.354 | 0.290 |
| 100878134 | cg12691219 | ARMCX3   | 0.054 | 0.070 | 0.405 | 0.338 | 0.481 | 0.531 | 0.440 | 0.336 | 0.423 | 0.354 |
| 100878294 | cg05832562 | ARMCX3   | 0.015 | 0.021 | 0.355 | 0.290 | 0.435 | 0.485 | 0.369 | 0.309 | 0.376 | 0.310 |
| 100878326 | cg11704309 | ARMCX3   | 0.029 | 0.040 | 0.360 | 0.260 | 0.443 | 0.493 | 0.489 | 0.300 | 0.400 | 0.359 |
| 101380437 | cg26937423 | TCEAL2   | 0.028 | 0.044 | 0.375 | 0.341 | 0.405 | 0.455 | 0.422 | 0.313 | 0.375 | 0.302 |
| 101380592 | cg14711543 | TCEAL2   | 0.048 | 0.065 | 0.369 | 0.293 | 0.452 | 0.502 | 0.450 | 0.364 | 0.385 | 0.526 |
| 101380608 | cg00611101 | TCEAL2   | 0.030 | 0.043 | 0.341 | 0.265 | 0.416 | 0.466 | 0.370 | 0.290 | 0.289 | 0.425 |

|           |            |          |       |       |       |       |       |       |       |       |       |       |
|-----------|------------|----------|-------|-------|-------|-------|-------|-------|-------|-------|-------|-------|
| 101906537 | cg10670396 | GPRASP1  | 0.017 | 0.025 | 0.313 | 0.256 | 0.412 | 0.462 | 0.317 | 0.247 | 0.318 | 0.386 |
| 101906886 | cg12295100 | GPRASP1  | 0.071 | 0.093 | 0.407 | 0.347 | 0.475 | 0.525 | 0.378 | 0.405 | 0.491 | 0.349 |
| 103401777 | cg03978312 | MCART6   | 0.146 | 0.176 | 0.449 | 0.376 | 0.503 | 0.553 | 0.485 | 0.511 | 0.428 | 0.434 |
| 103401960 | cg25367647 | MCART6   | 0.020 | 0.028 | 0.441 | 0.393 | 0.513 | 0.563 | 0.432 | 0.458 | 0.488 | 0.353 |
| 106449802 | cg26555756 | CXorf41  | 0.045 | 0.063 | 0.400 | 0.334 | 0.447 | 0.497 | 0.436 | 0.369 | 0.364 | 0.256 |
| 106449854 | cg17337467 | CXorf41  | 0.060 | 0.087 | 0.371 | 0.336 | 0.420 | 0.470 | 0.455 | 0.339 | 0.358 | 0.368 |
| 106449867 | cg06350796 | CXorf41  | 0.020 | 0.041 | 0.355 | 0.269 | 0.424 | 0.474 | 0.497 | 0.408 | 0.433 | 0.429 |
| 106959829 | cg24318558 | TSC22D3  | 0.035 | 0.050 | 0.448 | 0.381 | 0.491 | 0.541 | 0.532 | 0.441 | 0.440 | 0.345 |
| 106959895 | cg11907074 | TSC22D3  | 0.038 | 0.048 | 0.337 | 0.307 | 0.387 | 0.437 | 0.460 | 0.317 | 0.328 | 0.351 |
| 107019244 | cg03422380 | TSC22D3  | 0.027 | 0.039 | 0.390 | 0.293 | 0.449 | 0.499 | 0.510 | 0.374 | 0.398 | 0.372 |
| 107019262 | cg18677034 | TSC22D3  | 0.033 | 0.037 | 0.449 | 0.405 | 0.520 | 0.570 | 0.513 | 0.446 | 0.433 | 0.411 |
| 107019333 | cg23264750 | TSC22D3  | 0.031 | 0.038 | 0.469 | 0.390 | 0.524 | 0.574 | 0.539 | 0.401 | 0.458 | 0.460 |
| 107019610 | cg21456313 | TSC22D3  | 0.024 | 0.034 | 0.499 | 0.396 | 0.609 | 0.659 | 0.615 | 0.478 | 0.488 | 0.555 |
| 107069001 | cg15062055 | MID2     | 0.052 | 0.072 | 0.340 | 0.255 | 0.412 | 0.462 | 0.428 | 0.400 | 0.287 | 0.392 |
| 107069417 | cg19771541 | MID2     | 0.060 | 0.080 | 0.408 | 0.351 | 0.444 | 0.494 | 0.511 | 0.477 | 0.370 | 0.460 |
| 107334275 | cg27584800 | ATG4A    | 0.038 | 0.066 | 0.426 | 0.373 | 0.496 | 0.546 | 0.620 | 0.478 | 0.546 | 0.547 |
| 107334626 | cg18044482 | ATG4A    | 0.018 | 0.022 | 0.362 | 0.327 | 0.403 | 0.453 | 0.424 | 0.346 | 0.351 | 0.378 |
| 107979988 | cg00538420 | IRS4     | 0.057 | 0.091 | 0.365 | 0.255 | 0.466 | 0.516 | 0.450 | 0.283 | 0.407 | 0.433 |
| 107980144 | cg18161489 | IRS4     | 0.132 | 0.190 | 0.350 | 0.287 | 0.404 | 0.454 | 0.420 | 0.371 | 0.370 | 0.401 |
| 109561508 | cg13208429 | AMMECR1  | 0.042 | 0.055 | 0.417 | 0.307 | 0.516 | 0.566 | 0.612 | 0.416 | 0.412 | 0.410 |
| 109561515 | cg17959735 | AMMECR1  | 0.041 | 0.049 | 0.392 | 0.324 | 0.463 | 0.513 | 0.503 | 0.340 | 0.374 | 0.369 |
| 109561747 | cg05782651 | AMMECR1  | 0.030 | 0.051 | 0.376 | 0.322 | 0.472 | 0.522 | 0.415 | 0.414 | 0.375 | 0.485 |
| 110038886 | cg05921207 | CHRDL1   | 0.087 | 0.115 | 0.469 | 0.411 | 0.521 | 0.571 | 0.560 | 0.476 | 0.472 | 0.481 |
| 110039078 | cg19053358 | CHRDL1   | 0.048 | 0.069 | 0.403 | 0.307 | 0.465 | 0.515 | 0.549 | 0.442 | 0.456 | 0.393 |
| 117250753 | cg13024202 | KLHL13   | 0.039 | 0.056 | 0.433 | 0.384 | 0.489 | 0.539 | 0.496 | 0.463 | 0.466 | 0.489 |
| 117250943 | cg08447449 | KLHL13   | 0.030 | 0.036 | 0.323 | 0.283 | 0.371 | 0.421 | 0.424 | 0.349 | 0.288 | 0.343 |
| 117250962 | cg04029664 | KLHL13   | 0.061 | 0.078 | 0.470 | 0.415 | 0.525 | 0.575 | 0.606 | 0.463 | 0.450 | 0.467 |
| 117251000 | cg20786418 | KLHL13   | 0.075 | 0.118 | 0.422 | 0.355 | 0.464 | 0.514 | 0.484 | 0.469 | 0.395 | 0.493 |
| 117480246 | cg24597825 | WDR44    | 0.027 | 0.038 | 0.447 | 0.405 | 0.482 | 0.532 | 0.503 | 0.459 | 0.466 | 0.434 |
| 117480893 | cg27557909 | WDR44    | 0.050 | 0.072 | 0.340 | 0.255 | 0.397 | 0.447 | 0.509 | 0.367 | 0.451 | 0.301 |
| 117630362 | cg16586165 | DOCK11   | 0.035 | 0.061 | 0.345 | 0.277 | 0.444 | 0.494 | 0.400 | 0.377 | 0.258 | 0.434 |
| 117630565 | cg19334385 | DOCK11   | 0.051 | 0.075 | 0.421 | 0.380 | 0.476 | 0.526 | 0.441 | 0.414 | 0.486 | 0.482 |
| 118370356 | cg07876586 | PGRMC1   | 0.031 | 0.043 | 0.377 | 0.325 | 0.459 | 0.509 | 0.389 | 0.439 | 0.385 | 0.351 |
| 118370461 | cg05418443 | PGRMC1   | 0.023 | 0.029 | 0.399 | 0.330 | 0.430 | 0.480 | 0.433 | 0.404 | 0.435 | 0.421 |
| 118533106 | cg07256221 | SLC25A43 | 0.039 | 0.043 | 0.475 | 0.447 | 0.507 | 0.557 | 0.456 | 0.427 | 0.478 | 0.400 |
| 118533786 | cg04602218 | SLC25A43 | 0.040 | 0.060 | 0.346 | 0.287 | 0.385 | 0.435 | 0.333 | 0.399 | 0.442 | 0.352 |
| 118739824 | cg08214610 | NKRF     | 0.018 | 0.023 | 0.351 | 0.304 | 0.418 | 0.468 | 0.333 | 0.308 | 0.396 | 0.417 |
| 118740132 | cg23446945 | NKRF     | 0.026 | 0.034 | 0.431 | 0.354 | 0.502 | 0.552 | 0.423 | 0.467 | 0.462 | 0.415 |
| 118826802 | cg15845873 | SEPT6    | 0.028 | 0.034 | 0.361 | 0.287 | 0.440 | 0.490 | 0.065 | 0.272 | 0.287 | 0.343 |
| 118826918 | cg12393253 | SEPT6    | 0.062 | 0.084 | 0.312 | 0.251 | 0.415 | 0.465 | 0.151 | 0.317 | 0.285 | 0.352 |
| 118827095 | cg25553791 | SEPT6    | 0.042 | 0.051 | 0.383 | 0.275 | 0.453 | 0.503 | 0.111 | 0.368 | 0.299 | 0.370 |
| 118986976 | cg12527112 | UPF3B    | 0.026 | 0.035 | 0.482 | 0.345 | 0.579 | 0.629 | 0.106 | 0.429 | 0.428 | 0.351 |
| 118987146 | cg04184316 | UPF3B    | 0.135 | 0.160 | 0.414 | 0.336 | 0.507 | 0.557 | 0.161 | 0.321 | 0.324 | 0.336 |
| 119077663 | cg19410841 | NKAP     | 0.031 | 0.040 | 0.467 | 0.408 | 0.628 | 0.678 | 0.099 | 0.375 | 0.462 | 0.426 |
| 119077820 | cg03122511 | NKAP     | 0.055 | 0.083 | 0.490 | 0.421 | 0.571 | 0.621 | 0.105 | 0.366 | 0.470 | 0.460 |
| 119078095 | cg13475427 | NKAP     | 0.102 | 0.119 | 0.457 | 0.402 | 0.557 | 0.607 | 0.154 | 0.442 | 0.406 | 0.456 |
| 119695102 | cg25698940 | CUL4B    | 0.030 | 0.043 | 0.353 | 0.306 | 0.404 | 0.454 | 0.091 | 0.343 | 0.338 | 0.315 |
| 119695210 | cg08784874 | CUL4B    | 0.025 | 0.036 | 0.492 | 0.442 | 0.557 | 0.607 | 0.066 | 0.383 | 0.411 | 0.397 |

|           |            |           |       |       |       |       |       |       |              |       |       |       |
|-----------|------------|-----------|-------|-------|-------|-------|-------|-------|--------------|-------|-------|-------|
| 119737620 | cg12047536 | MCTS1     | 0.035 | 0.055 | 0.404 | 0.317 | 0.476 | 0.526 | <b>0.082</b> | 0.318 | 0.349 | 0.379 |
| 119737675 | cg05782751 | MCTS1     | 0.081 | 0.126 | 0.448 | 0.330 | 0.543 | 0.593 | <b>0.122</b> | 0.462 | 0.501 | 0.479 |
| 119737885 | cg25622910 | MCTS1     | 0.034 | 0.064 | 0.300 | 0.253 | 0.355 | 0.405 | <b>0.085</b> | 0.272 | 0.311 | 0.298 |
| 119737891 | cg24931094 | MCTS1     | 0.056 | 0.077 | 0.350 | 0.278 | 0.411 | 0.461 | <b>0.089</b> | 0.280 | 0.337 | 0.316 |
| 119764206 | cg07210774 | C1GALT1C1 | 0.023 | 0.039 | 0.500 | 0.399 | 0.575 | 0.625 | <b>0.085</b> | 0.456 | 0.507 | 0.439 |
| 119764273 | cg09238847 | C1GALT1C1 | 0.037 | 0.046 | 0.298 | 0.257 | 0.353 | 0.403 | <b>0.071</b> | 0.250 | 0.264 | 0.242 |
| 122993037 | cg23933262 | XIAP      | 0.140 | 0.220 | 0.384 | 0.320 | 0.475 | 0.525 | <b>0.218</b> | 0.347 | 0.285 | 0.329 |
| 122993419 | cg00920960 | XIAP      | 0.018 | 0.028 | 0.394 | 0.355 | 0.461 | 0.511 | <b>0.078</b> | 0.322 | 0.358 | 0.382 |
| 122993679 | cg06772067 | XIAP      | 0.019 | 0.027 | 0.432 | 0.351 | 0.499 | 0.549 | <b>0.086</b> | 0.377 | 0.403 | 0.381 |
| 122993913 | cg07874334 | XIAP      | 0.029 | 0.040 | 0.440 | 0.351 | 0.527 | 0.577 | <b>0.080</b> | 0.386 | 0.441 | 0.387 |
| 122993976 | cg17033281 | XIAP      | 0.033 | 0.039 | 0.384 | 0.287 | 0.452 | 0.502 | <b>0.068</b> | 0.345 | 0.352 | 0.343 |
| 122994030 | cg21711683 | XIAP      | 0.020 | 0.026 | 0.411 | 0.356 | 0.468 | 0.518 | <b>0.074</b> | 0.352 | 0.407 | 0.409 |
| 122994069 | cg09950034 | XIAP      | 0.055 | 0.074 | 0.442 | 0.386 | 0.491 | 0.541 | <b>0.134</b> | 0.368 | 0.447 | 0.438 |
| 128674366 | cg16716035 | OCRL      | 0.033 | 0.044 | 0.399 | 0.276 | 0.498 | 0.548 | <b>0.069</b> | 0.356 | 0.345 | 0.388 |
| 128674686 | cg13532816 | OCRL      | 0.031 | 0.041 | 0.469 | 0.356 | 0.571 | 0.621 | <b>0.090</b> | 0.400 | 0.434 | 0.459 |
| 128913684 | cg02283402 | SASH3     | 0.025 | 0.036 | 0.382 | 0.333 | 0.463 | 0.513 | <b>0.089</b> | 0.335 | 0.400 | 0.343 |
| 128913786 | cg10649042 | SASH3     | 0.016 | 0.026 | 0.430 | 0.378 | 0.536 | 0.586 | <b>0.076</b> | 0.386 | 0.437 | 0.348 |
| 128913854 | cg05872215 | SASH3     | 0.033 | 0.044 | 0.415 | 0.362 | 0.510 | 0.560 | <b>0.094</b> | 0.331 | 0.356 | 0.313 |
| 129243806 | cg21489390 | ELF4      | 0.014 | 0.023 | 0.461 | 0.370 | 0.514 | 0.564 | <b>0.047</b> | 0.413 | 0.428 | 0.403 |
| 129243872 | cg06428055 | ELF4      | 0.024 | 0.037 | 0.426 | 0.362 | 0.481 | 0.531 | <b>0.082</b> | 0.325 | 0.377 | 0.404 |
| 129299924 | cg05045028 | AIFM1     | 0.033 | 0.048 | 0.385 | 0.309 | 0.447 | 0.497 | <b>0.083</b> | 0.334 | 0.370 | 0.353 |
| 129299948 | cg06252876 | AIFM1     | 0.024 | 0.031 | 0.378 | 0.309 | 0.452 | 0.502 | <b>0.059</b> | 0.326 | 0.348 | 0.335 |
| 129300230 | cg01913024 | AIFM1     | 0.038 | 0.046 | 0.414 | 0.339 | 0.514 | 0.564 | <b>0.061</b> | 0.314 | 0.386 | 0.350 |
| 129473599 | cg24721916 | SLC25A14  | 0.025 | 0.039 | 0.429 | 0.331 | 0.542 | 0.592 | <b>0.056</b> | 0.377 | 0.338 | 0.315 |
| 129473637 | cg01108554 | SLC25A14  | 0.030 | 0.053 | 0.454 | 0.358 | 0.543 | 0.593 | <b>0.096</b> | 0.410 | 0.470 | 0.398 |
| 129473931 | cg23220418 | SLC25A14  | 0.035 | 0.044 | 0.414 | 0.311 | 0.546 | 0.596 | <b>0.070</b> | 0.353 | 0.361 | 0.320 |
| 129474007 | cg06734027 | SLC25A14  | 0.056 | 0.074 | 0.454 | 0.422 | 0.521 | 0.571 | <b>0.148</b> | 0.399 | 0.446 | 0.439 |
| 130037175 | cg01372992 | ENOX2     | 0.032 | 0.042 | 0.347 | 0.265 | 0.420 | 0.470 | <b>0.113</b> | 0.335 | 0.316 | 0.358 |
| 130037457 | cg17086681 | ENOX2     | 0.030 | 0.036 | 0.425 | 0.297 | 0.529 | 0.579 | <b>0.116</b> | 0.399 | 0.454 | 0.387 |
| 130037593 | cg06288403 | ENOX2     | 0.029 | 0.052 | 0.447 | 0.336 | 0.527 | 0.577 | <b>0.065</b> | 0.319 | 0.317 | 0.341 |
| 130423130 | cg01010618 | IGSF1     | 0.038 | 0.064 | 0.371 | 0.280 | 0.432 | 0.482 | <b>0.130</b> | 0.440 | 0.400 | 0.456 |
| 130423289 | cg04882894 | IGSF1     | 0.050 | 0.086 | 0.400 | 0.325 | 0.468 | 0.518 | <b>0.137</b> | 0.348 | 0.364 | 0.443 |
| 130423431 | cg18452672 | IGSF1     | 0.146 | 0.173 | 0.319 | 0.254 | 0.360 | 0.410 | <b>0.217</b> | 0.334 | 0.331 | 0.300 |
| 131157326 | cg00739787 | MST4      | 0.031 | 0.050 | 0.334 | 0.290 | 0.398 | 0.448 | <b>0.075</b> | 0.380 | 0.303 | 0.319 |
| 131157336 | cg25395546 | MST4      | 0.021 | 0.030 | 0.360 | 0.257 | 0.459 | 0.509 | <b>0.052</b> | 0.302 | 0.252 | 0.300 |
| 131623259 | cg21471515 | MBNL3     | 0.033 | 0.046 | 0.333 | 0.283 | 0.414 | 0.464 | <b>0.107</b> | 0.336 | 0.419 | 0.361 |
| 131623878 | cg18878700 | MBNL3     | 0.028 | 0.036 | 0.416 | 0.290 | 0.481 | 0.531 | <b>0.067</b> | 0.349 | 0.339 | 0.354 |
| 131624026 | cg12942133 | MBNL3     | 0.020 | 0.044 | 0.489 | 0.424 | 0.546 | 0.596 | <b>0.072</b> | 0.419 | 0.467 | 0.466 |
| 132549625 | cg10720577 | GPC4      | 0.060 | 0.071 | 0.401 | 0.311 | 0.490 | 0.540 | <b>0.113</b> | 0.400 | 0.401 | 0.411 |
| 132550131 | cg12600766 | GPC4      | 0.051 | 0.075 | 0.437 | 0.329 | 0.551 | 0.601 | <b>0.083</b> | 0.380 | 0.304 | 0.347 |
| 133594210 | cg19022966 | HPRT1     | 0.082 | 0.108 | 0.496 | 0.417 | 0.596 | 0.646 | <b>0.148</b> | 0.423 | 0.456 | 0.427 |
| 133594951 | cg02264284 | HPRT1     | 0.019 | 0.032 | 0.380 | 0.280 | 0.472 | 0.522 | <b>0.050</b> | 0.276 | 0.334 | 0.292 |
| 133941107 | cg14972002 | FAM122C   | 0.025 | 0.034 | 0.342 | 0.273 | 0.399 | 0.449 | <b>0.060</b> | 0.314 | 0.309 | 0.281 |
| 133941121 | cg12263679 | FAM122C   | 0.012 | 0.022 | 0.338 | 0.294 | 0.407 | 0.457 | <b>0.036</b> | 0.318 | 0.339 | 0.301 |
| 133941190 | cg24248049 | FAM122C   | 0.032 | 0.049 | 0.369 | 0.286 | 0.422 | 0.472 | <b>0.121</b> | 0.314 | 0.393 | 0.377 |
| 133941225 | cg01309671 | FAM122C   | 0.044 | 0.055 | 0.382 | 0.286 | 0.473 | 0.523 | <b>0.104</b> | 0.312 | 0.341 | 0.269 |
| 133941745 | cg15904427 | FAM122C   | 0.016 | 0.025 | 0.397 | 0.306 | 0.477 | 0.527 | <b>0.037</b> | 0.365 | 0.401 | 0.383 |
| 134166046 | cg01099541 | FAM127A   | 0.032 | 0.040 | 0.384 | 0.305 | 0.456 | 0.506 | <b>0.107</b> | 0.336 | 0.382 | 0.322 |



|           |            |              |       |       |       |       |       |       |              |       |       |       |
|-----------|------------|--------------|-------|-------|-------|-------|-------|-------|--------------|-------|-------|-------|
| 134166205 | cg15043283 | FAM127A      | 0.049 | 0.068 | 0.485 | 0.335 | 0.584 | 0.634 | <b>0.059</b> | 0.350 | 0.377 | 0.372 |
| 134478785 | cg14029201 | ZNF75D       | 0.047 | 0.059 | 0.391 | 0.313 | 0.481 | 0.531 | <b>0.093</b> | 0.344 | 0.350 | 0.376 |
| 134478884 | cg05908188 | ZNF75D       | 0.025 | 0.035 | 0.438 | 0.350 | 0.491 | 0.541 | <b>0.075</b> | 0.369 | 0.402 | 0.371 |
| 135067468 | cg22166305 | SLC9A6       | 0.029 | 0.044 | 0.402 | 0.332 | 0.487 | 0.537 | <b>0.066</b> | 0.269 | 0.284 | 0.278 |
| 135068355 | cg19860691 | SLC9A6       | 0.038 | 0.069 | 0.492 | 0.417 | 0.570 | 0.620 | <b>0.094</b> | 0.459 | 0.528 | 0.494 |
| 135332975 | cg08860608 | MAP7D3       | 0.031 | 0.041 | 0.470 | 0.390 | 0.580 | 0.630 | <b>0.111</b> | 0.410 | 0.468 | 0.431 |
| 135333567 | cg27047283 | MAP7D3       | 0.026 | 0.036 | 0.490 | 0.419 | 0.543 | 0.593 | <b>0.062</b> | 0.468 | 0.482 | 0.475 |
| 135333705 | cg13818628 | MAP7D3       | 0.017 | 0.031 | 0.424 | 0.300 | 0.506 | 0.556 | <b>0.084</b> | 0.404 | 0.449 | 0.356 |
| 135333917 | cg14601312 | MAP7D3       | 0.043 | 0.067 | 0.398 | 0.334 | 0.487 | 0.537 | <b>0.102</b> | 0.354 | 0.450 | 0.421 |
| 135579980 | cg19949137 | HTATSF1      | 0.022 | 0.031 | 0.498 | 0.402 | 0.591 | 0.641 | <b>0.084</b> | 0.453 | 0.482 | 0.461 |
| 135580098 | cg02698615 | HTATSF1      | 0.028 | 0.042 | 0.409 | 0.319 | 0.485 | 0.535 | <b>0.095</b> | 0.362 | 0.364 | 0.406 |
| 135863323 | cg09517019 | ARHGEF6      | 0.046 | 0.067 | 0.443 | 0.319 | 0.563 | 0.613 | <b>0.093</b> | 0.340 | 0.422 | 0.519 |
| 135863582 | cg01134144 | ARHGEF6      | 0.110 | 0.147 | 0.352 | 0.292 | 0.467 | 0.517 | <b>0.143</b> | 0.232 | 0.263 | 0.185 |
| 136113882 | cg13937075 | GPR101       | 0.067 | 0.084 | 0.496 | 0.447 | 0.551 | 0.601 | <b>0.173</b> | 0.481 | 0.495 | 0.468 |
| 136113998 | cg06223806 | GPR101       | 0.041 | 0.051 | 0.375 | 0.311 | 0.467 | 0.517 | <b>0.125</b> | 0.296 | 0.311 | 0.356 |
| 136114047 | cg05566296 | GPR101       | 0.050 | 0.075 | 0.484 | 0.425 | 0.565 | 0.615 | <b>0.113</b> | 0.430 | 0.442 | 0.462 |
| 136114207 | cg01228667 | GPR101       | 0.024 | 0.040 | 0.346 | 0.286 | 0.417 | 0.467 | <b>0.067</b> | 0.302 | 0.329 | 0.277 |
| 139587184 | cg02847500 | SOX3         | 0.087 | 0.138 | 0.442 | 0.338 | 0.505 | 0.555 | <b>0.154</b> | 0.416 | 0.403 | 0.499 |
| 139587868 | cg18496053 | SOX3         | 0.142 | 0.211 | 0.424 | 0.344 | 0.514 | 0.564 | <b>0.214</b> | 0.397 | 0.459 | 0.509 |
| 140271259 | cg09112156 | LDOC1        | 0.049 | 0.073 | 0.492 | 0.442 | 0.535 | 0.585 | <b>0.105</b> | 0.422 | 0.425 | 0.458 |
| 140271314 | cg11005845 | LDOC1        | 0.058 | 0.070 | 0.396 | 0.266 | 0.521 | 0.571 | <b>0.078</b> | 0.317 | 0.354 | 0.306 |
| 142721811 | cg10288278 | SLITRK4      | 0.097 | 0.153 | 0.474 | 0.391 | 0.518 | 0.568 | <b>0.204</b> | 0.454 | 0.429 | 0.461 |
| 142721819 | cg23297872 | SLITRK4      | 0.073 | 0.135 | 0.426 | 0.338 | 0.522 | 0.572 | <b>0.177</b> | 0.399 | 0.368 | 0.439 |
| 144899567 | cg25062147 | SLITRK2      | 0.059 | 0.118 | 0.428 | 0.382 | 0.468 | 0.518 | <b>0.168</b> | 0.434 | 0.432 | 0.421 |
| 144899592 | cg09610569 | SLITRK2      | 0.058 | 0.103 | 0.470 | 0.405 | 0.527 | 0.577 | <b>0.159</b> | 0.451 | 0.461 | 0.446 |
| 148586734 | cg02264182 | IDS          | 0.059 | 0.088 | 0.499 | 0.436 | 0.592 | 0.642 | <b>0.130</b> | 0.472 | 0.478 | 0.494 |
| 148586931 | cg09018810 | IDS          | 0.032 | 0.053 | 0.464 | 0.421 | 0.530 | 0.580 | <b>0.094</b> | 0.409 | 0.420 | 0.406 |
| 148586978 | cg17920241 | IDS          | 0.031 | 0.045 | 0.436 | 0.351 | 0.486 | 0.536 | <b>0.108</b> | 0.450 | 0.418 | 0.431 |
| 148586983 | cg17337021 | IDS          | 0.033 | 0.042 | 0.498 | 0.422 | 0.603 | 0.653 | <b>0.092</b> | 0.435 | 0.422 | 0.466 |
| 149106647 | cg09610589 | LOC100272228 | 0.031 | 0.050 | 0.464 | 0.398 | 0.521 | 0.571 | <b>0.087</b> | 0.438 | 0.461 | 0.436 |
| 149106889 | cg27327591 | LOC100272228 | 0.039 | 0.049 | 0.409 | 0.302 | 0.461 | 0.511 | <b>0.098</b> | 0.391 | 0.408 | 0.379 |
| 151806225 | cg00529027 | GABRQ        | 0.074 | 0.101 | 0.450 | 0.358 | 0.532 | 0.582 | <b>0.158</b> | 0.403 | 0.424 | 0.389 |
| 151806352 | cg18769303 | GABRQ        | 0.061 | 0.081 | 0.476 | 0.406 | 0.526 | 0.576 | <b>0.166</b> | 0.461 | 0.454 | 0.476 |
| 152735637 | cg07792041 | HAUS7        | 0.032 | 0.044 | 0.333 | 0.264 | 0.444 | 0.494 | <b>0.080</b> | 0.315 | 0.315 | 0.330 |
| 152735785 | cg24964466 | HAUS7        | 0.025 | 0.041 | 0.454 | 0.364 | 0.536 | 0.586 | <b>0.078</b> | 0.434 | 0.414 | 0.428 |
| 152938907 | cg25323012 | PNCK         | 0.046 | 0.074 | 0.450 | 0.330 | 0.536 | 0.586 | <b>0.123</b> | 0.335 | 0.415 | 0.489 |
| 152938924 | cg12919379 | PNCK         | 0.076 | 0.107 | 0.417 | 0.343 | 0.479 | 0.529 | <b>0.117</b> | 0.348 | 0.362 | 0.378 |
| 152989592 | cg09594760 | BCAP31       | 0.073 | 0.096 | 0.467 | 0.380 | 0.580 | 0.630 | <b>0.087</b> | 0.315 | 0.395 | 0.390 |
| 152989895 | cg04024675 | BCAP31       | 0.039 | 0.051 | 0.478 | 0.379 | 0.567 | 0.617 | <b>0.069</b> | 0.337 | 0.377 | 0.388 |
| 152989902 | cg11906884 | BCAP31       | 0.050 | 0.071 | 0.391 | 0.314 | 0.482 | 0.532 | <b>0.073</b> | 0.279 | 0.295 | 0.301 |
| 152990043 | cg06018273 | BCAP31       | 0.030 | 0.039 | 0.492 | 0.358 | 0.575 | 0.625 | <b>0.108</b> | 0.408 | 0.441 | 0.450 |
| 153060166 | cg14783837 | IDH3G        | 0.042 | 0.062 | 0.338 | 0.266 | 0.414 | 0.464 | <b>0.070</b> | 0.311 | 0.338 | 0.342 |
| 153060354 | cg26105341 | IDH3G        | 0.072 | 0.098 | 0.442 | 0.309 | 0.548 | 0.598 | <b>0.058</b> | 0.315 | 0.378 | 0.369 |
| 153602658 | cg03672021 | FLNA         | 0.046 | 0.075 | 0.450 | 0.378 | 0.506 | 0.556 | <b>0.141</b> | 0.410 | 0.446 | 0.462 |
| 153603126 | cg15879692 | FLNA         | 0.043 | 0.065 | 0.346 | 0.270 | 0.408 | 0.458 | <b>0.095</b> | 0.355 | 0.429 | 0.348 |
| 153640960 | cg16405946 | DNASE1L1     | 0.036 | 0.044 | 0.498 | 0.437 | 0.575 | 0.625 | <b>0.109</b> | 0.427 | 0.460 | 0.460 |
| 153640967 | cg05100268 | DNASE1L1     | 0.028 | 0.047 | 0.480 | 0.377 | 0.554 | 0.604 | <b>0.084</b> | 0.401 | 0.497 | 0.445 |
| 153672393 | cg08408091 | FAM50A       | 0.048 | 0.072 | 0.473 | 0.369 | 0.555 | 0.605 | <b>0.068</b> | 0.348 | 0.419 | 0.389 |

|           |            |        |       |       |       |       |       |       |              |       |       |       |
|-----------|------------|--------|-------|-------|-------|-------|-------|-------|--------------|-------|-------|-------|
| 153672689 | cg20616045 | FAM50A | 0.026 | 0.033 | 0.412 | 0.343 | 0.483 | 0.533 | <b>0.055</b> | 0.330 | 0.378 | 0.382 |
| 153775885 | cg00813156 | IKBKG  | 0.035 | 0.047 | 0.462 | 0.366 | 0.541 | 0.591 | <b>0.054</b> | 0.381 | 0.401 | 0.397 |
| 153775995 | cg13550079 | IKBKG  | 0.037 | 0.060 | 0.448 | 0.324 | 0.547 | 0.597 | <b>0.116</b> | 0.387 | 0.379 | 0.417 |
| 153979491 | cg10026671 | GAB3   | 0.081 | 0.111 | 0.424 | 0.379 | 0.504 | 0.554 | <b>0.112</b> | 0.436 | 0.382 | 0.306 |
| 153979543 | cg23896806 | GAB3   | 0.049 | 0.074 | 0.395 | 0.348 | 0.487 | 0.537 | <b>0.120</b> | 0.324 | 0.334 | 0.366 |
| 154254936 | cg03172171 | FUNDC2 | 0.051 | 0.113 | 0.411 | 0.369 | 0.486 | 0.536 | <b>0.104</b> | 0.371 | 0.441 | 0.422 |
| 154254947 | cg26116400 | FUNDC2 | 0.038 | 0.070 | 0.383 | 0.317 | 0.451 | 0.501 | <b>0.070</b> | 0.313 | 0.393 | 0.366 |
| 154255534 | cg21697779 | FUNDC2 | 0.028 | 0.052 | 0.416 | 0.324 | 0.524 | 0.574 | <b>0.089</b> | 0.358 | 0.428 | 0.358 |

A yellow background means probes in duplicated regions. A pale blue background means probes in deleted regions. When the  $\beta$ value is higher than 0.5 and the  $\beta$ value is higher than the maximum level of female controls + 0.05, the  $\beta$ value is shown in red letters. When more than two consecutive probes'  $\beta$ value within 1,000 bp from TSS of a gene satisfy this criteria, the  $\beta$ value is shown in red bold letters. The  $\beta$  value less than 0.15 is shown in blue letters. When more than two consecutive probes'  $\beta$ value within 1,000 bp from TSS of a gene satisfy this criteria, the  $\beta$ value is shown in blue bold letters.
