# Supplementary material for: Methylation status of genes escaping from X-chromosome inactivation in patients with X-chromosome rearrangements
Source: PubMed Central journal article supplement (PMC8244138; doi:10.1186/s13148-021-01121-6), 2021-06-30
Supplement: 13148_2021_1121_MOESM8_ESM.pdf [file 13148_2021_1121_MOESM8_ESM.pdf]

**Table S5. The methylation ratio of CpGs in promoter regions of genes in PAR1**

| Genomic position | Gene name | Female control         | Patient 1         | Patient 2         | Patient 3         | Patient 4         | Coverage  |           |           |           |
|------------------|-----------|------------------------|-------------------|-------------------|-------------------|-------------------|-----------|-----------|-----------|-----------|
|                  |           | Mean methylation ratio | methylation ratio | methylation ratio | methylation ratio | methylation ratio | Patient 1 | Patient 2 | Patient 3 | Patient 4 |
| 192148           | PLCXD1    | 0.13                   | 0.10              | 0.07              | 0.00              | 0.00              | 21        | 45        | 20        | 19        |
| 192149           | PLCXD1    | 0.02                   | 0.00              | 0.00              | 0.00              | 0.00              | 11        | 21        | 16        | 15        |
| 192327           | PLCXD1    | 0.00                   | 0.20              | 0.09              | 0.00              | 0.00              | 10        | 11        | 16        | 11        |
| 192430           | PLCXD1    | 0.11                   | 0.40              | 0.09              | 0.00              | 0.00              | 10        | 11        | 16        | 11        |
| 192433           | PLCXD1    | 0.08                   | 0.20              | 0.09              | 0.00              | 0.00              | 10        | 11        | 16        | 11        |
| 192460           | PLCXD1    | 0.10                   | 0.20              | 0.09              | 0.00              | 0.09              | 10        | 11        | 16        | 11        |
| 192631           | PLCXD1    | 0.00                   | 0.09              | 0.00              | 0.00              | 0.00              | 11        | 18        | 25        | 11        |
| 192637           | PLCXD1    | 0.02                   | 0.09              | 0.00              | 0.00              | 0.00              | 11        | 18        | 25        | 11        |
| 192639           | PLCXD1    | 0.01                   | 0.18              | 0.00              | 0.00              | 0.00              | 11        | 17        | 25        | 11        |
| 192651           | PLCXD1    | 0.02                   | 0.00              | 0.00              | 0.00              | 0.00              | 11        | 18        | 25        | 11        |
| 192662           | PLCXD1    | 0.00                   | 0.09              | 0.00              | 0.00              | 0.00              | 11        | 18        | 25        | 11        |
| 192717           | PLCXD1    | 0.01                   | 0.00              | 0.00              | 0.00              | 0.00              | 11        | 19        | 24        | 11        |
| 192738           | PLCXD1    | 0.00                   | 0.00              | 0.00              | 0.00              | 0.00              | 11        | 19        | 24        | 11        |
| 192765           | PLCXD1    | 0.06                   | 0.18              | 0.00              | 0.00              | 0.00              | 11        | 19        | 24        | 10        |
| 193646           | PLCXD1    | 0.01                   | 0.00              | 0.00              | 0.00              | 0.00              | 10        | 22        | 30        | 12        |
| 193656           | PLCXD1    | 0.00                   | 0.00              | 0.05              | 0.10              | 0.00              | 10        | 22        | 30        | 12        |
| 193660           | PLCXD1    | 0.03                   | 0.00              | 0.05              | 0.10              | 0.08              | 10        | 22        | 30        | 12        |
| 193669           | PLCXD1    | 0.08                   | 0.00              | 0.05              | 0.03              | 0.00              | 10        | 21        | 30        | 12        |
| 193677           | PLCXD1    | 0.05                   | 0.00              | 0.05              | 0.00              | 0.08              | 10        | 22        | 30        | 12        |
| 193680           | PLCXD1    | 0.01                   | 0.00              | 0.00              | 0.03              | 0.00              | 10        | 22        | 30        | 12        |
| 193682           | PLCXD1    | 0.01                   | 0.00              | 0.00              | 0.00              | 0.00              | 10        | 22        | 30        | 12        |
| 193686           | PLCXD1    | 0.04                   | 0.00              | 0.00              | 0.00              | 0.00              | 10        | 22        | 30        | 12        |
| 193734           | PLCXD1    | 0.03                   | 0.00              | 0.05              | 0.03              | 0.00              | 10        | 22        | 30        | 12        |
| 193741           | PLCXD1    | 0.00                   | 0.00              | 0.09              | 0.07              | 0.00              | 10        | 22        | 30        | 12        |
| 193760           | PLCXD1    | 0.05                   | 0.00              | 0.00              | 0.17              | 0.00              | 10        | 22        | 30        | 12        |
| 193768           | PLCXD1    | 0.01                   | 0.00              | 0.00              | 0.03              | 0.00              | 10        | 22        | 30        | 12        |
| 347497           | PPP2R3B   | 0.08                   | 0.00              | 0.04              | 0.06              | 0.00              | 15        | 24        | 33        | 13        |
| 347502           | PPP2R3B   | 0.00                   | 0.00              | 0.00              | 0.00              | 0.00              | 15        | 24        | 33        | 13        |
| 347508           | PPP2R3B   | 0.00                   | 0.00              | 0.00              | 0.00              | 0.00              | 15        | 24        | 33        | 13        |
| 347516           | PPP2R3B   | 0.00                   | 0.00              | 0.04              | 0.00              | 0.00              | 15        | 24        | 33        | 13        |
| 347522           | PPP2R3B   | 0.00                   | 0.00              | 0.00              | 0.00              | 0.00              | 15        | 24        | 33        | 13        |
| 347527           | PPP2R3B   | 0.00                   | 0.00              | 0.00              | 0.00              | 0.00              | 15        | 24        | 33        | 13        |

|        |         |      |      |      |      |      |    |    |    |    |
|--------|---------|------|------|------|------|------|----|----|----|----|
| 347538 | PPP2R3B | 0.01 | 0.00 | 0.00 | 0.03 | 0.00 | 15 | 24 | 33 | 13 |
| 347540 | PPP2R3B | 0.01 | 0.00 | 0.04 | 0.00 | 0.00 | 15 | 24 | 33 | 13 |
| 347543 | PPP2R3B | 0.00 | 0.00 | 0.04 | 0.00 | 0.00 | 15 | 24 | 33 | 13 |
| 347559 | PPP2R3B | 0.01 | 0.00 | 0.00 | 0.03 | 0.00 | 15 | 24 | 33 | 13 |
| 347561 | PPP2R3B | 0.00 | 0.00 | 0.00 | 0.00 | 0.00 | 15 | 24 | 33 | 13 |
| 347566 | PPP2R3B | 0.00 | 0.00 | 0.00 | 0.00 | 0.00 | 15 | 24 | 33 | 13 |
| 347575 | PPP2R3B | 0.01 | 0.07 | 0.04 | 0.00 | 0.00 | 15 | 24 | 33 | 13 |
| 347577 | PPP2R3B | 0.00 | 0.00 | 0.00 | 0.00 | 0.00 | 15 | 24 | 33 | 13 |
| 347583 | PPP2R3B | 0.00 | 0.00 | 0.00 | 0.03 | 0.00 | 15 | 24 | 33 | 13 |
| 347585 | PPP2R3B | 0.05 | 0.00 | 0.00 | 0.03 | 0.00 | 15 | 24 | 33 | 13 |
| 347590 | PPP2R3B | 0.02 | 0.00 | 0.04 | 0.00 | 0.00 | 15 | 24 | 33 | 13 |
| 347592 | PPP2R3B | 0.00 | 0.00 | 0.00 | 0.00 | 0.00 | 15 | 24 | 33 | 13 |
| 347599 | PPP2R3B | 0.01 | 0.00 | 0.00 | 0.00 | 0.00 | 15 | 24 | 33 | 13 |
| 347610 | PPP2R3B | 0.00 | 0.00 | 0.00 | 0.00 | 0.00 | 15 | 24 | 32 | 13 |
| 347612 | PPP2R3B | 0.01 | 0.00 | 0.00 | 0.00 | 0.00 | 15 | 24 | 32 | 13 |
| 348019 | PPP2R3B | 0.08 | 0.09 | 0.00 | 0.00 | 0.09 | 23 | 23 | 27 | 11 |
| 348023 | PPP2R3B | 0.00 | 0.00 | 0.00 | 0.00 | 0.00 | 21 | 19 | 26 | 11 |
| 348024 | PPP2R3B | 0.00 | 0.00 | 0.00 | 0.00 | 0.00 | 14 | 20 | 10 | 10 |
| 348031 | PPP2R3B | 0.00 | 0.00 | 0.00 | 0.00 | 0.00 | 21 | 19 | 25 | 11 |
| 348032 | PPP2R3B | 0.00 | 0.00 | 0.00 | 0.00 | 0.00 | 14 | 20 | 10 | 11 |
| 348035 | PPP2R3B | 0.00 | 0.00 | 0.00 | 0.00 | 0.00 | 21 | 19 | 26 | 11 |
| 348036 | PPP2R3B | 0.00 | 0.00 | 0.00 | 0.00 | 0.00 | 14 | 20 | 10 | 11 |
| 348048 | PPP2R3B | 0.00 | 0.00 | 0.05 | 0.00 | 0.00 | 21 | 19 | 27 | 11 |
| 348049 | PPP2R3B | 0.00 | 0.00 | 0.00 | 0.00 | 0.00 | 14 | 20 | 10 | 11 |
| 348050 | PPP2R3B | 0.00 | 0.00 | 0.00 | 0.00 | 0.00 | 21 | 19 | 27 | 11 |
| 348051 | PPP2R3B | 0.01 | 0.00 | 0.00 | 0.00 | 0.00 | 14 | 20 | 10 | 11 |
| 348055 | PPP2R3B | 0.00 | 0.00 | 0.00 | 0.00 | 0.00 | 21 | 19 | 27 | 11 |
| 348056 | PPP2R3B | 0.00 | 0.00 | 0.00 | 0.00 | 0.00 | 14 | 20 | 10 | 11 |
| 348084 | PPP2R3B | 0.01 | 0.00 | 0.00 | 0.00 | 0.00 | 21 | 19 | 27 | 11 |
| 348085 | PPP2R3B | 0.01 | 0.00 | 0.00 | 0.00 | 0.00 | 14 | 20 | 10 | 11 |
| 348101 | PPP2R3B | 0.00 | 0.05 | 0.00 | 0.00 | 0.00 | 21 | 19 | 27 | 11 |
| 348102 | PPP2R3B | 0.00 | 0.00 | 0.00 | 0.00 | 0.00 | 14 | 20 | 10 | 11 |
| 348109 | PPP2R3B | 0.00 | 0.00 | 0.05 | 0.00 | 0.00 | 21 | 19 | 27 | 11 |
| 348110 | PPP2R3B | 0.00 | 0.07 | 0.00 | 0.00 | 0.00 | 14 | 20 | 10 | 11 |
| 348115 | PPP2R3B | 0.01 | 0.00 | 0.00 | 0.00 | 0.00 | 21 | 19 | 27 | 11 |
| 348116 | PPP2R3B | 0.00 | 0.00 | 0.00 | 0.00 | 0.00 | 14 | 20 | 10 | 11 |

|         |         |      |      |      |      |      |    |    |    |    |
|---------|---------|------|------|------|------|------|----|----|----|----|
| 348131  | PPP2R3B | 0.06 | 0.00 | 0.00 | 0.10 | 0.00 | 15 | 19 | 10 | 10 |
| 584580  | SHOX    | 0.09 | 0.00 | 0.05 | 0.00 | 0.00 | 18 | 21 | 25 | 10 |
| 584590  | SHOX    | 0.06 | 0.00 | 0.10 | 0.00 | 0.30 | 18 | 20 | 26 | 10 |
| 584591  | SHOX    | 0.02 | 0.00 | 0.00 | 0.00 | 0.00 | 20 | 38 | 39 | 16 |
| 584592  | SHOX    | 0.04 | 0.00 | 0.05 | 0.00 | 0.00 | 18 | 20 | 26 | 10 |
| 584593  | SHOX    | 0.06 | 0.00 | 0.00 | 0.05 | 0.00 | 20 | 38 | 39 | 16 |
| 584613  | SHOX    | 0.02 | 0.00 | 0.05 | 0.04 | 0.00 | 18 | 20 | 26 | 10 |
| 584614  | SHOX    | 0.02 | 0.05 | 0.03 | 0.03 | 0.00 | 20 | 38 | 39 | 16 |
| 584636  | SHOX    | 0.01 | 0.11 | 0.05 | 0.00 | 0.10 | 18 | 20 | 26 | 10 |
| 584637  | SHOX    | 0.02 | 0.00 | 0.03 | 0.00 | 0.00 | 20 | 38 | 39 | 16 |
| 584642  | SHOX    | 0.01 | 0.00 | 0.10 | 0.00 | 0.00 | 18 | 20 | 26 | 10 |
| 584643  | SHOX    | 0.01 | 0.00 | 0.03 | 0.05 | 0.00 | 20 | 38 | 39 | 16 |
| 584654  | SHOX    | 0.01 | 0.00 | 0.05 | 0.00 | 0.00 | 18 | 20 | 26 | 10 |
| 584655  | SHOX    | 0.03 | 0.00 | 0.03 | 0.03 | 0.00 | 20 | 38 | 39 | 16 |
| 584682  | SHOX    | 0.01 | 0.00 | 0.05 | 0.04 | 0.00 | 18 | 20 | 26 | 10 |
| 584683  | SHOX    | 0.01 | 0.00 | 0.00 | 0.00 | 0.06 | 20 | 38 | 39 | 16 |
| 584693  | SHOX    | 0.00 | 0.00 | 0.05 | 0.00 | 0.00 | 18 | 20 | 26 | 10 |
| 584694  | SHOX    | 0.01 | 0.00 | 0.00 | 0.03 | 0.00 | 20 | 38 | 39 | 16 |
| 584703  | SHOX    | 0.05 | 0.00 | 0.18 | 0.17 | 0.14 | 26 | 39 | 12 | 14 |
| 584704  | SHOX    | 0.03 | 0.08 | 0.02 | 0.00 | 0.11 | 25 | 47 | 47 | 18 |
| 1510466 | SLC25A6 | 0.05 | 0.00 | 0.06 | 0.00 | 0.03 | 13 | 18 | 17 | 35 |
| 1510475 | SLC25A6 | 0.00 | 0.00 | 0.00 | 0.00 | 0.00 | 13 | 18 | 19 | 35 |
| 1510476 | SLC25A6 | 0.00 | 0.00 | 0.09 | 0.00 | 0.00 | 19 | 23 | 16 | 32 |
| 1510502 | SLC25A6 | 0.01 | 0.00 | 0.00 | 0.05 | 0.00 | 13 | 18 | 19 | 35 |
| 1510503 | SLC25A6 | 0.01 | 0.00 | 0.00 | 0.00 | 0.00 | 20 | 23 | 16 | 32 |
| 1510509 | SLC25A6 | 0.02 | 0.00 | 0.00 | 0.00 | 0.00 | 13 | 18 | 19 | 35 |
| 1510510 | SLC25A6 | 0.01 | 0.00 | 0.00 | 0.00 | 0.00 | 20 | 23 | 16 | 32 |
| 1510518 | SLC25A6 | 0.00 | 0.00 | 0.00 | 0.00 | 0.00 | 13 | 18 | 19 | 35 |
| 1510519 | SLC25A6 | 0.00 | 0.00 | 0.00 | 0.00 | 0.00 | 20 | 23 | 16 | 32 |
| 1510538 | SLC25A6 | 0.00 | 0.00 | 0.00 | 0.00 | 0.00 | 13 | 18 | 19 | 35 |
| 1510539 | SLC25A6 | 0.01 | 0.00 | 0.00 | 0.00 | 0.00 | 20 | 23 | 17 | 32 |
| 1510540 | SLC25A6 | 0.00 | 0.00 | 0.00 | 0.00 | 0.00 | 13 | 18 | 19 | 35 |
| 1510541 | SLC25A6 | 0.01 | 0.00 | 0.00 | 0.00 | 0.00 | 20 | 23 | 17 | 32 |
| 1510546 | SLC25A6 | 0.01 | 0.00 | 0.00 | 0.00 | 0.00 | 13 | 18 | 19 | 35 |
| 1510547 | SLC25A6 | 0.01 | 0.00 | 0.04 | 0.00 | 0.03 | 20 | 23 | 17 | 32 |
| 1510558 | SLC25A6 | 0.00 | 0.00 | 0.00 | 0.00 | 0.00 | 13 | 18 | 19 | 35 |

|         |         |      |      |      |      |      |    |    |    |    |
|---------|---------|------|------|------|------|------|----|----|----|----|
| 1510559 | SLC25A6 | 0.02 | 0.00 | 0.00 | 0.06 | 0.00 | 20 | 23 | 17 | 32 |
| 1510563 | SLC25A6 | 0.00 | 0.00 | 0.00 | 0.00 | 0.00 | 13 | 18 | 19 | 35 |
| 1510564 | SLC25A6 | 0.00 | 0.00 | 0.00 | 0.00 | 0.00 | 20 | 23 | 17 | 32 |
| 1510575 | SLC25A6 | 0.01 | 0.00 | 0.00 | 0.00 | 0.00 | 13 | 18 | 19 | 35 |
| 1510576 | SLC25A6 | 0.00 | 0.00 | 0.00 | 0.00 | 0.00 | 20 | 23 | 17 | 32 |
| 1510579 | SLC25A6 | 0.00 | 0.00 | 0.00 | 0.00 | 0.00 | 13 | 18 | 19 | 35 |
| 1510580 | SLC25A6 | 0.01 | 0.00 | 0.04 | 0.00 | 0.00 | 20 | 23 | 17 | 32 |
| 1510583 | SLC25A6 | 0.04 | 0.04 | 0.03 | 0.00 | 0.00 | 23 | 32 | 20 | 35 |
| 1510766 | SLC25A6 | 0.08 | 0.00 | 0.05 | 0.04 | 0.05 | 22 | 21 | 23 | 43 |
| 1510771 | SLC25A6 | 0.02 | 0.00 | 0.00 | 0.00 | 0.00 | 23 | 22 | 25 | 44 |
| 1510772 | SLC25A6 | 0.01 | 0.00 | 0.00 | 0.00 | 0.02 | 20 | 20 | 15 | 42 |
| 1510775 | SLC25A6 | 0.01 | 0.00 | 0.00 | 0.00 | 0.00 | 23 | 22 | 25 | 44 |
| 1510776 | SLC25A6 | 0.01 | 0.00 | 0.00 | 0.00 | 0.00 | 20 | 20 | 15 | 42 |
| 1510777 | SLC25A6 | 0.01 | 0.00 | 0.00 | 0.00 | 0.00 | 23 | 22 | 25 | 44 |
| 1510778 | SLC25A6 | 0.01 | 0.00 | 0.00 | 0.00 | 0.00 | 20 | 20 | 15 | 42 |
| 1510781 | SLC25A6 | 0.01 | 0.00 | 0.00 | 0.04 | 0.00 | 23 | 22 | 25 | 44 |
| 1510782 | SLC25A6 | 0.01 | 0.00 | 0.00 | 0.00 | 0.00 | 20 | 20 | 15 | 42 |
| 1510783 | SLC25A6 | 0.00 | 0.00 | 0.00 | 0.00 | 0.00 | 22 | 22 | 25 | 44 |
| 1510784 | SLC25A6 | 0.00 | 0.00 | 0.00 | 0.00 | 0.00 | 20 | 20 | 15 | 42 |
| 1510811 | SLC25A6 | 0.00 | 0.00 | 0.00 | 0.00 | 0.02 | 23 | 22 | 25 | 44 |
| 1510812 | SLC25A6 | 0.00 | 0.00 | 0.00 | 0.00 | 0.00 | 19 | 20 | 15 | 42 |
| 1510815 | SLC25A6 | 0.00 | 0.04 | 0.00 | 0.00 | 0.02 | 23 | 22 | 25 | 44 |
| 1510816 | SLC25A6 | 0.00 | 0.00 | 0.00 | 0.00 | 0.00 | 20 | 20 | 15 | 42 |
| 1510819 | SLC25A6 | 0.01 | 0.00 | 0.00 | 0.04 | 0.00 | 23 | 22 | 25 | 44 |
| 1510820 | SLC25A6 | 0.01 | 0.00 | 0.00 | 0.00 | 0.02 | 20 | 20 | 15 | 42 |
| 1510827 | SLC25A6 | 0.00 | 0.00 | 0.00 | 0.00 | 0.00 | 23 | 22 | 25 | 44 |
| 1510828 | SLC25A6 | 0.00 | 0.00 | 0.00 | 0.00 | 0.00 | 20 | 20 | 15 | 42 |
| 1510831 | SLC25A6 | 0.02 | 0.00 | 0.00 | 0.00 | 0.00 | 23 | 22 | 25 | 44 |
| 1510832 | SLC25A6 | 0.00 | 0.00 | 0.00 | 0.00 | 0.00 | 20 | 20 | 15 | 42 |
| 1510845 | SLC25A6 | 0.01 | 0.00 | 0.00 | 0.04 | 0.00 | 23 | 22 | 25 | 44 |
| 1510846 | SLC25A6 | 0.03 | 0.00 | 0.00 | 0.00 | 0.00 | 20 | 20 | 15 | 42 |
| 1510848 | SLC25A6 | 0.00 | 0.00 | 0.00 | 0.00 | 0.02 | 23 | 22 | 25 | 44 |
| 1510849 | SLC25A6 | 0.01 | 0.05 | 0.00 | 0.00 | 0.00 | 20 | 20 | 15 | 42 |
| 1510851 | SLC25A6 | 0.01 | 0.00 | 0.00 | 0.04 | 0.00 | 23 | 22 | 25 | 44 |
| 1510852 | SLC25A6 | 0.00 | 0.00 | 0.00 | 0.00 | 0.02 | 20 | 20 | 15 | 42 |
| 1510860 | SLC25A6 | 0.03 | 0.08 | 0.00 | 0.10 | 0.00 | 24 | 25 | 31 | 47 |

|         |         |      |      |      |      |      |    |    |    |    |
|---------|---------|------|------|------|------|------|----|----|----|----|
| 1510861 | SLC25A6 | 0.08 | 0.04 | 0.06 | 0.00 | 0.02 | 23 | 36 | 22 | 54 |
| 1510937 | SLC25A6 | 0.00 | 0.00 | 0.00 | 0.04 | 0.00 | 14 | 20 | 27 | 32 |
| 1511148 | SLC25A6 | 0.06 | 0.09 | 0.06 | 0.07 | 0.00 | 11 | 17 | 14 | 30 |
| 1511241 | SLC25A6 | 0.02 | 0.06 | 0.00 | 0.00 | 0.00 | 17 | 16 | 29 | 23 |
| 1511255 | SLC25A6 | 0.00 | 0.12 | 0.00 | 0.00 | 0.04 | 17 | 16 | 29 | 23 |
| 1511263 | SLC25A6 | 0.00 | 0.06 | 0.00 | 0.00 | 0.00 | 17 | 16 | 29 | 23 |
| 1511266 | SLC25A6 | 0.00 | 0.06 | 0.00 | 0.00 | 0.00 | 17 | 16 | 29 | 23 |
| 1511275 | SLC25A6 | 0.01 | 0.06 | 0.00 | 0.03 | 0.04 | 17 | 16 | 29 | 23 |
| 1511287 | SLC25A6 | 0.00 | 0.06 | 0.00 | 0.00 | 0.00 | 17 | 16 | 29 | 23 |
| 1511289 | SLC25A6 | 0.00 | 0.06 | 0.00 | 0.00 | 0.00 | 17 | 16 | 29 | 23 |
| 1511318 | SLC25A6 | 0.00 | 0.06 | 0.06 | 0.00 | 0.00 | 16 | 16 | 29 | 23 |
| 1511331 | SLC25A6 | 0.00 | 0.00 | 0.06 | 0.00 | 0.00 | 16 | 16 | 29 | 23 |
| 1511335 | SLC25A6 | 0.00 | 0.00 | 0.00 | 0.00 | 0.00 | 16 | 16 | 29 | 23 |
| 1511339 | SLC25A6 | 0.00 | 0.00 | 0.00 | 0.00 | 0.00 | 16 | 16 | 29 | 23 |
| 1511353 | SLC25A6 | 0.01 | 0.06 | 0.00 | 0.00 | 0.00 | 16 | 16 | 29 | 23 |
| 1511384 | SLC25A6 | 0.00 | 0.00 | 0.00 | 0.00 | 0.00 | 16 | 16 | 29 | 23 |
| 1511389 | SLC25A6 | 0.00 | 0.06 | 0.00 | 0.00 | 0.00 | 16 | 16 | 29 | 23 |
| 1511395 | SLC25A6 | 0.00 | 0.06 | 0.00 | 0.00 | 0.00 | 16 | 16 | 29 | 23 |
| 1511398 | SLC25A6 | 0.00 | 0.06 | 0.00 | 0.00 | 0.00 | 16 | 16 | 28 | 23 |
| 1511402 | SLC25A6 | 0.00 | 0.06 | 0.00 | 0.00 | 0.00 | 16 | 16 | 29 | 23 |
| 1511558 | SLC25A6 | 0.04 | 0.00 | 0.00 | 0.08 | 0.00 | 11 | 16 | 13 | 23 |
| 1511568 | SLC25A6 | 0.00 | 0.00 | 0.00 | 0.00 | 0.00 | 11 | 16 | 14 | 23 |
| 1511569 | SLC25A6 | 0.00 | 0.00 | 0.00 | 0.00 | 0.00 | 23 | 14 | 15 | 31 |
| 1511570 | SLC25A6 | 0.00 | 0.00 | 0.00 | 0.07 | 0.04 | 11 | 16 | 14 | 23 |
| 1511571 | SLC25A6 | 0.00 | 0.00 | 0.00 | 0.00 | 0.00 | 23 | 14 | 15 | 31 |
| 1511572 | SLC25A6 | 0.00 | 0.00 | 0.00 | 0.00 | 0.00 | 11 | 16 | 14 | 23 |
| 1511573 | SLC25A6 | 0.00 | 0.00 | 0.00 | 0.00 | 0.00 | 23 | 14 | 15 | 31 |
| 1511581 | SLC25A6 | 0.00 | 0.00 | 0.00 | 0.00 | 0.00 | 11 | 16 | 14 | 23 |
| 1511582 | SLC25A6 | 0.00 | 0.00 | 0.00 | 0.00 | 0.03 | 23 | 14 | 15 | 30 |
| 1511584 | SLC25A6 | 0.00 | 0.00 | 0.00 | 0.00 | 0.00 | 11 | 16 | 14 | 23 |
| 1511585 | SLC25A6 | 0.00 | 0.00 | 0.00 | 0.00 | 0.00 | 23 | 14 | 15 | 31 |
| 1511593 | SLC25A6 | 0.00 | 0.00 | 0.00 | 0.00 | 0.00 | 11 | 16 | 14 | 23 |
| 1511594 | SLC25A6 | 0.01 | 0.00 | 0.00 | 0.00 | 0.00 | 23 | 14 | 15 | 31 |
| 1511599 | SLC25A6 | 0.00 | 0.00 | 0.00 | 0.00 | 0.00 | 11 | 16 | 14 | 23 |
| 1511600 | SLC25A6 | 0.00 | 0.00 | 0.00 | 0.00 | 0.00 | 23 | 14 | 15 | 31 |
| 1511601 | SLC25A6 | 0.00 | 0.00 | 0.00 | 0.00 | 0.00 | 11 | 16 | 14 | 22 |

|         |         |      |      |      |      |      |    |    |    |    |
|---------|---------|------|------|------|------|------|----|----|----|----|
| 1511602 | SLC25A6 | 0.02 | 0.00 | 0.00 | 0.00 | 0.00 | 23 | 14 | 15 | 31 |
| 1511612 | SLC25A6 | 0.00 | 0.00 | 0.00 | 0.00 | 0.00 | 11 | 16 | 14 | 23 |
| 1511613 | SLC25A6 | 0.01 | 0.00 | 0.00 | 0.00 | 0.00 | 23 | 14 | 15 | 31 |
| 1511618 | SLC25A6 | 0.00 | 0.00 | 0.00 | 0.00 | 0.00 | 11 | 16 | 14 | 23 |
| 1511619 | SLC25A6 | 0.00 | 0.00 | 0.00 | 0.00 | 0.03 | 23 | 14 | 15 | 31 |
| 1511623 | SLC25A6 | 0.00 | 0.00 | 0.00 | 0.00 | 0.04 | 11 | 16 | 14 | 23 |
| 1511624 | SLC25A6 | 0.00 | 0.00 | 0.00 | 0.00 | 0.00 | 23 | 14 | 15 | 31 |
| 1511631 | SLC25A6 | 0.03 | 0.00 | 0.00 | 0.00 | 0.00 | 11 | 16 | 14 | 23 |
| 1511632 | SLC25A6 | 0.00 | 0.00 | 0.00 | 0.00 | 0.00 | 23 | 14 | 15 | 31 |
| 1511633 | SLC25A6 | 0.00 | 0.00 | 0.06 | 0.00 | 0.00 | 11 | 16 | 14 | 23 |
| 1511634 | SLC25A6 | 0.00 | 0.00 | 0.00 | 0.00 | 0.00 | 23 | 14 | 15 | 31 |
| 1511636 | SLC25A6 | 0.00 | 0.00 | 0.00 | 0.00 | 0.00 | 11 | 16 | 13 | 23 |
| 1511637 | SLC25A6 | 0.01 | 0.00 | 0.00 | 0.00 | 0.00 | 23 | 14 | 15 | 31 |
| 1511643 | SLC25A6 | 0.04 | 0.00 | 0.00 | 0.00 | 0.00 | 11 | 16 | 14 | 23 |
| 1511644 | SLC25A6 | 0.02 | 0.00 | 0.00 | 0.00 | 0.00 | 23 | 14 | 15 | 31 |
| 1511645 | SLC25A6 | 0.00 | 0.00 | 0.00 | 0.00 | 0.00 | 11 | 16 | 14 | 23 |
| 1511646 | SLC25A6 | 0.00 | 0.09 | 0.00 | 0.00 | 0.00 | 23 | 14 | 15 | 31 |
| 1511650 | SLC25A6 | 0.02 | 0.00 | 0.00 | 0.07 | 0.00 | 24 | 17 | 15 | 33 |
| 1570938 | ASMTL   | 0.11 | 0.11 | 0.16 | 0.05 | 0.10 | 37 | 43 | 38 | 90 |
| 1571536 | ASMTL   | 0.00 | 0.00 | 0.03 | 0.00 | 0.00 | 33 | 37 | 17 | 53 |
| 1571575 | ASMTL   | 0.00 | 0.00 | 0.00 | 0.00 | 0.02 | 33 | 37 | 17 | 53 |
| 1571587 | ASMTL   | 0.13 | 0.06 | 0.03 | 0.00 | 0.08 | 33 | 37 | 16 | 53 |
| 1571608 | ASMTL   | 0.09 | 0.06 | 0.00 | 0.09 | 0.13 | 17 | 27 | 22 | 23 |
| 1571621 | ASMTL   | 0.00 | 0.00 | 0.00 | 0.00 | 0.00 | 17 | 27 | 22 | 25 |
| 1571622 | ASMTL   | 0.00 | 0.00 | 0.00 | 0.00 | 0.00 | 17 | 21 | 20 | 37 |
| 1571636 | ASMTL   | 0.01 | 0.00 | 0.04 | 0.05 | 0.00 | 17 | 27 | 22 | 25 |
| 1571637 | ASMTL   | 0.00 | 0.00 | 0.00 | 0.00 | 0.00 | 17 | 21 | 20 | 37 |
| 1571641 | ASMTL   | 0.03 | 0.00 | 0.00 | 0.00 | 0.00 | 17 | 27 | 22 | 25 |
| 1571642 | ASMTL   | 0.00 | 0.00 | 0.00 | 0.00 | 0.03 | 17 | 21 | 20 | 37 |
| 1571643 | ASMTL   | 0.00 | 0.00 | 0.00 | 0.00 | 0.00 | 17 | 27 | 22 | 25 |
| 1571644 | ASMTL   | 0.00 | 0.00 | 0.00 | 0.00 | 0.00 | 17 | 21 | 20 | 37 |
| 1571663 | ASMTL   | 0.00 | 0.00 | 0.00 | 0.00 | 0.00 | 17 | 27 | 22 | 25 |
| 1571664 | ASMTL   | 0.01 | 0.00 | 0.00 | 0.00 | 0.03 | 17 | 21 | 20 | 37 |
| 1571666 | ASMTL   | 0.00 | 0.00 | 0.00 | 0.00 | 0.00 | 17 | 27 | 22 | 25 |
| 1571667 | ASMTL   | 0.00 | 0.00 | 0.00 | 0.00 | 0.00 | 17 | 21 | 20 | 37 |
| 1571676 | ASMTL   | 0.00 | 0.00 | 0.00 | 0.00 | 0.00 | 17 | 27 | 22 | 25 |

|         |       |      |      |      |      |      |    |    |    |    |
|---------|-------|------|------|------|------|------|----|----|----|----|
| 1571677 | ASMTL | 0.00 | 0.00 | 0.00 | 0.00 | 0.00 | 17 | 21 | 20 | 37 |
| 1571691 | ASMTL | 0.00 | 0.00 | 0.00 | 0.00 | 0.00 | 17 | 27 | 22 | 25 |
| 1571692 | ASMTL | 0.01 | 0.00 | 0.00 | 0.00 | 0.00 | 17 | 21 | 20 | 37 |
| 1571693 | ASMTL | 0.01 | 0.00 | 0.00 | 0.00 | 0.00 | 17 | 27 | 22 | 25 |
| 1571694 | ASMTL | 0.00 | 0.00 | 0.00 | 0.00 | 0.03 | 17 | 21 | 19 | 37 |
| 1571720 | ASMTL | 0.08 | 0.18 | 0.00 | 0.00 | 0.03 | 17 | 21 | 20 | 37 |
| 1572529 | ASMTL | 0.03 | 0.00 | 0.00 | 0.00 | 0.00 | 10 | 20 | 11 | 21 |
| 1573211 | ASMTL | 0.02 | 0.00 | 0.00 | 0.00 | 0.03 | 12 | 18 | 30 | 39 |
| 1573232 | ASMTL | 0.00 | 0.00 | 0.00 | 0.00 | 0.03 | 12 | 18 | 30 | 39 |
| 1573243 | ASMTL | 0.01 | 0.00 | 0.00 | 0.00 | 0.00 | 12 | 18 | 30 | 39 |
| 1573245 | ASMTL | 0.00 | 0.00 | 0.00 | 0.03 | 0.03 | 12 | 18 | 30 | 39 |
| 1573248 | ASMTL | 0.00 | 0.00 | 0.00 | 0.00 | 0.03 | 12 | 18 | 30 | 39 |
| 1573264 | ASMTL | 0.00 | 0.00 | 0.00 | 0.00 | 0.03 | 12 | 18 | 29 | 39 |
| 1573266 | ASMTL | 0.00 | 0.00 | 0.00 | 0.00 | 0.03 | 12 | 18 | 30 | 39 |
| 1573268 | ASMTL | 0.00 | 0.00 | 0.00 | 0.00 | 0.03 | 12 | 18 | 30 | 40 |
| 1573279 | ASMTL | 0.02 | 0.00 | 0.00 | 0.00 | 0.03 | 12 | 18 | 30 | 40 |
| 1573310 | ASMTL | 0.00 | 0.00 | 0.00 | 0.00 | 0.03 | 12 | 18 | 30 | 40 |
| 1573334 | ASMTL | 0.01 | 0.00 | 0.00 | 0.00 | 0.03 | 12 | 18 | 29 | 40 |
| 1573339 | ASMTL | 0.00 | 0.00 | 0.00 | 0.04 | 0.03 | 12 | 18 | 28 | 40 |
| 1573350 | ASMTL | 0.05 | 0.08 | 0.06 | 0.00 | 0.10 | 12 | 18 | 27 | 40 |
| 1655910 | P2RY8 | 0.04 | 0.00 | 0.00 | 0.00 | 0.02 | 17 | 11 | 23 | 43 |
| 1655917 | P2RY8 | 0.00 | 0.00 | 0.00 | 0.00 | 0.00 | 17 | 12 | 25 | 44 |
| 1655918 | P2RY8 | 0.01 | 0.00 | 0.00 | 0.00 | 0.00 | 15 | 26 | 32 | 37 |
| 1655944 | P2RY8 | 0.00 | 0.00 | 0.00 | 0.00 | 0.00 | 17 | 12 | 25 | 44 |
| 1655945 | P2RY8 | 0.01 | 0.00 | 0.00 | 0.00 | 0.00 | 15 | 26 | 32 | 37 |
| 1655975 | P2RY8 | 0.00 | 0.00 | 0.00 | 0.04 | 0.00 | 17 | 12 | 26 | 45 |
| 1655976 | P2RY8 | 0.01 | 0.00 | 0.00 | 0.00 | 0.00 | 15 | 26 | 32 | 37 |
| 1655981 | P2RY8 | 0.00 | 0.00 | 0.00 | 0.00 | 0.00 | 17 | 11 | 26 | 45 |
| 1655982 | P2RY8 | 0.00 | 0.00 | 0.00 | 0.03 | 0.00 | 15 | 26 | 32 | 37 |
| 1655988 | P2RY8 | 0.01 | 0.00 | 0.00 | 0.00 | 0.00 | 17 | 12 | 26 | 45 |
| 1655989 | P2RY8 | 0.00 | 0.00 | 0.00 | 0.00 | 0.00 | 15 | 25 | 32 | 37 |
| 1656031 | P2RY8 | 0.00 | 0.00 | 0.00 | 0.00 | 0.00 | 17 | 12 | 26 | 45 |
| 1656032 | P2RY8 | 0.02 | 0.00 | 0.00 | 0.00 | 0.00 | 15 | 26 | 32 | 37 |
| 1656035 | P2RY8 | 0.00 | 0.00 | 0.00 | 0.00 | 0.00 | 17 | 12 | 26 | 45 |
| 1656036 | P2RY8 | 0.01 | 0.00 | 0.00 | 0.00 | 0.00 | 15 | 26 | 31 | 37 |
| 1656040 | P2RY8 | 0.00 | 0.00 | 0.00 | 0.00 | 0.00 | 17 | 11 | 26 | 45 |

|         |         |      |      |      |      |      |    |    |    |    |
|---------|---------|------|------|------|------|------|----|----|----|----|
| 1656041 | P2RY8   | 0.01 | 0.07 | 0.00 | 0.00 | 0.00 | 15 | 26 | 32 | 37 |
| 1656056 | P2RY8   | 0.03 | 0.00 | 0.00 | 0.06 | 0.00 | 14 | 26 | 33 | 38 |
| 1710331 | AKAP17A | 0.01 | 0.00 | 0.00 | 0.00 | 0.00 | 15 | 23 | 22 | 38 |
| 1710355 | AKAP17A | 0.00 | 0.00 | 0.00 | 0.00 | 0.00 | 15 | 23 | 21 | 38 |
| 1710360 | AKAP17A | 0.01 | 0.00 | 0.00 | 0.00 | 0.00 | 15 | 23 | 21 | 38 |
| 1710366 | AKAP17A | 0.00 | 0.00 | 0.00 | 0.00 | 0.00 | 15 | 23 | 21 | 38 |
| 1710368 | AKAP17A | 0.00 | 0.00 | 0.00 | 0.00 | 0.00 | 15 | 23 | 21 | 38 |
| 1710372 | AKAP17A | 0.00 | 0.00 | 0.00 | 0.00 | 0.03 | 15 | 23 | 21 | 38 |
| 1710374 | AKAP17A | 0.00 | 0.00 | 0.00 | 0.00 | 0.00 | 15 | 23 | 21 | 38 |
| 1710389 | AKAP17A | 0.01 | 0.00 | 0.00 | 0.00 | 0.00 | 15 | 23 | 21 | 38 |
| 1710397 | AKAP17A | 0.04 | 0.00 | 0.09 | 0.00 | 0.00 | 15 | 23 | 20 | 38 |
| 1710587 | AKAP17A | 0.05 | 0.00 | 0.00 | 0.00 | 0.07 | 11 | 18 | 18 | 29 |
| 1710594 | AKAP17A | 0.01 | 0.09 | 0.00 | 0.00 | 0.03 | 11 | 19 | 18 | 29 |
| 1710595 | AKAP17A | 0.00 | 0.00 | 0.00 | 0.00 | 0.00 | 13 | 26 | 15 | 45 |
| 1710597 | AKAP17A | 0.00 | 0.00 | 0.00 | 0.00 | 0.00 | 11 | 19 | 18 | 29 |
| 1710598 | AKAP17A | 0.00 | 0.00 | 0.00 | 0.00 | 0.00 | 13 | 26 | 15 | 45 |
| 1710604 | AKAP17A | 0.00 | 0.00 | 0.00 | 0.00 | 0.00 | 11 | 19 | 18 | 29 |
| 1710605 | AKAP17A | 0.01 | 0.00 | 0.00 | 0.00 | 0.00 | 13 | 26 | 15 | 45 |
| 1710607 | AKAP17A | 0.00 | 0.00 | 0.00 | 0.00 | 0.00 | 11 | 19 | 18 | 29 |
| 1710608 | AKAP17A | 0.00 | 0.00 | 0.00 | 0.00 | 0.00 | 13 | 25 | 15 | 45 |
| 1710623 | AKAP17A | 0.01 | 0.00 | 0.00 | 0.00 | 0.00 | 11 | 19 | 18 | 29 |
| 1710624 | AKAP17A | 0.00 | 0.00 | 0.00 | 0.00 | 0.00 | 13 | 26 | 15 | 45 |
| 1710626 | AKAP17A | 0.00 | 0.00 | 0.00 | 0.00 | 0.00 | 11 | 19 | 18 | 29 |
| 1710627 | AKAP17A | 0.00 | 0.00 | 0.04 | 0.07 | 0.00 | 13 | 26 | 15 | 45 |
| 1710629 | AKAP17A | 0.01 | 0.00 | 0.00 | 0.00 | 0.00 | 11 | 19 | 18 | 29 |
| 1710630 | AKAP17A | 0.01 | 0.00 | 0.00 | 0.07 | 0.02 | 13 | 26 | 15 | 45 |
| 1710632 | AKAP17A | 0.01 | 0.00 | 0.00 | 0.00 | 0.00 | 11 | 19 | 18 | 29 |
| 1710633 | AKAP17A | 0.01 | 0.00 | 0.00 | 0.00 | 0.02 | 13 | 26 | 15 | 45 |
| 1710642 | AKAP17A | 0.01 | 0.00 | 0.00 | 0.00 | 0.00 | 11 | 19 | 18 | 29 |
| 1710643 | AKAP17A | 0.00 | 0.00 | 0.00 | 0.00 | 0.00 | 13 | 26 | 15 | 45 |
| 1710648 | AKAP17A | 0.01 | 0.00 | 0.05 | 0.00 | 0.00 | 11 | 19 | 18 | 29 |
| 1710649 | AKAP17A | 0.00 | 0.00 | 0.00 | 0.00 | 0.00 | 13 | 26 | 15 | 45 |
| 1710656 | AKAP17A | 0.00 | 0.00 | 0.00 | 0.00 | 0.00 | 11 | 19 | 18 | 29 |
| 1710657 | AKAP17A | 0.00 | 0.00 | 0.00 | 0.00 | 0.00 | 13 | 26 | 15 | 45 |
| 1710658 | AKAP17A | 0.00 | 0.00 | 0.00 | 0.00 | 0.00 | 11 | 19 | 18 | 29 |
| 1710659 | AKAP17A | 0.00 | 0.00 | 0.00 | 0.00 | 0.00 | 13 | 26 | 15 | 45 |



|         |         |      |      |      |      |      |    |    |    |    |
|---------|---------|------|------|------|------|------|----|----|----|----|
| 1710671 | AKAP17A | 0.00 | 0.00 | 0.00 | 0.00 | 0.00 | 11 | 19 | 18 | 29 |
| 1710672 | AKAP17A | 0.00 | 0.00 | 0.00 | 0.00 | 0.00 | 13 | 26 | 15 | 45 |
| 1710677 | AKAP17A | 0.00 | 0.00 | 0.00 | 0.00 | 0.00 | 11 | 19 | 18 | 29 |
| 1710678 | AKAP17A | 0.01 | 0.00 | 0.00 | 0.00 | 0.02 | 13 | 26 | 15 | 45 |
| 1710687 | AKAP17A | 0.05 | 0.00 | 0.00 | 0.13 | 0.00 | 13 | 23 | 15 | 41 |
| 1710930 | AKAP17A | 0.01 | 0.00 | 0.00 | 0.00 | 0.00 | 11 | 10 | 20 | 15 |
| 1710951 | AKAP17A | 0.01 | 0.00 | 0.10 | 0.00 | 0.00 | 11 | 10 | 20 | 15 |
| 1710957 | AKAP17A | 0.01 | 0.00 | 0.00 | 0.05 | 0.00 | 11 | 10 | 21 | 15 |
| 1710973 | AKAP17A | 0.01 | 0.00 | 0.00 | 0.05 | 0.00 | 11 | 10 | 21 | 15 |
| 1710981 | AKAP17A | 0.01 | 0.00 | 0.00 | 0.05 | 0.14 | 11 | 10 | 21 | 14 |
| 1710989 | AKAP17A | 0.00 | 0.00 | 0.00 | 0.00 | 0.00 | 11 | 10 | 21 | 15 |
| 1711019 | AKAP17A | 0.00 | 0.00 | 0.00 | 0.00 | 0.00 | 11 | 10 | 21 | 14 |
| 1711024 | AKAP17A | 0.01 | 0.00 | 0.00 | 0.00 | 0.00 | 11 | 10 | 21 | 15 |
| 1711029 | AKAP17A | 0.01 | 0.09 | 0.00 | 0.00 | 0.07 | 11 | 10 | 21 | 15 |
| 1711033 | AKAP17A | 0.00 | 0.00 | 0.00 | 0.00 | 0.00 | 11 | 10 | 21 | 15 |
| 2527287 | CD99P1  | 0.00 | 0.00 | 0.00 | 0.00 | 0.00 | 12 | 25 | 13 | 30 |
| 2527292 | CD99P1  | 0.02 | 0.00 | 0.00 | 0.00 | 0.00 | 12 | 25 | 13 | 30 |
| 2527301 | CD99P1  | 0.00 | 0.08 | 0.00 | 0.08 | 0.00 | 12 | 25 | 13 | 30 |
| 2527349 | CD99P1  | 0.00 | 0.00 | 0.00 | 0.00 | 0.03 | 12 | 25 | 13 | 30 |
| 2527358 | CD99P1  | 0.01 | 0.00 | 0.00 | 0.00 | 0.00 | 12 | 25 | 14 | 30 |
| 2527360 | CD99P1  | 0.00 | 0.00 | 0.00 | 0.00 | 0.00 | 12 | 25 | 14 | 30 |
| 2527367 | CD99P1  | 0.01 | 0.00 | 0.00 | 0.00 | 0.00 | 12 | 25 | 14 | 30 |
| 2527376 | CD99P1  | 0.06 | 0.06 | 0.00 | 0.00 | 0.13 | 16 | 34 | 22 | 32 |
| 2527555 | CD99P1  | 0.00 | 0.00 | 0.00 | 0.00 | 0.00 | 15 | 14 | 17 | 18 |
| 2527557 | CD99P1  | 0.00 | 0.00 | 0.00 | 0.00 | 0.00 | 15 | 14 | 17 | 17 |
| 2527567 | CD99P1  | 0.00 | 0.00 | 0.00 | 0.00 | 0.00 | 15 | 14 | 17 | 18 |
| 2527569 | CD99P1  | 0.00 | 0.00 | 0.00 | 0.00 | 0.00 | 15 | 14 | 17 | 18 |
| 2527613 | CD99P1  | 0.00 | 0.00 | 0.00 | 0.00 | 0.00 | 15 | 14 | 17 | 18 |
| 2527618 | CD99P1  | 0.00 | 0.00 | 0.00 | 0.00 | 0.00 | 15 | 14 | 17 | 18 |
| 2527623 | CD99P1  | 0.00 | 0.00 | 0.00 | 0.00 | 0.00 | 15 | 14 | 17 | 18 |
| 2527625 | CD99P1  | 0.00 | 0.00 | 0.00 | 0.00 | 0.00 | 15 | 14 | 17 | 18 |
| 2527635 | CD99P1  | 0.05 | 0.07 | 0.00 | 0.00 | 0.00 | 15 | 14 | 16 | 17 |
| 2527687 | CD99P1  | 0.09 | 0.00 | 0.04 | 0.04 | 0.10 | 33 | 28 | 28 | 40 |
| 2527696 | CD99P1  | 0.02 | 0.00 | 0.00 | 0.00 | 0.00 | 33 | 29 | 30 | 42 |
| 2527697 | CD99P1  | 0.00 | 0.04 | 0.00 | 0.00 | 0.00 | 23 | 18 | 17 | 35 |
| 2527714 | CD99P1  | 0.01 | 0.00 | 0.00 | 0.00 | 0.00 | 33 | 28 | 30 | 42 |

|         |        |      |      |      |      |      |    |    |    |     |
|---------|--------|------|------|------|------|------|----|----|----|-----|
| 2527715 | CD99P1 | 0.01 | 0.04 | 0.00 | 0.00 | 0.00 | 23 | 18 | 17 | 35  |
| 2527740 | CD99P1 | 0.01 | 0.00 | 0.00 | 0.03 | 0.00 | 33 | 29 | 30 | 42  |
| 2527741 | CD99P1 | 0.01 | 0.04 | 0.00 | 0.00 | 0.00 | 23 | 18 | 17 | 34  |
| 2527761 | CD99P1 | 0.01 | 0.00 | 0.00 | 0.00 | 0.00 | 33 | 29 | 30 | 42  |
| 2527762 | CD99P1 | 0.00 | 0.04 | 0.00 | 0.00 | 0.00 | 23 | 18 | 17 | 34  |
| 2527770 | CD99P1 | 0.01 | 0.00 | 0.03 | 0.00 | 0.00 | 33 | 29 | 29 | 42  |
| 2527771 | CD99P1 | 0.02 | 0.09 | 0.00 | 0.00 | 0.03 | 23 | 18 | 17 | 34  |
| 2527819 | CD99P1 | 0.01 | 0.00 | 0.00 | 0.00 | 0.00 | 33 | 29 | 30 | 42  |
| 2527820 | CD99P1 | 0.01 | 0.09 | 0.00 | 0.00 | 0.03 | 23 | 18 | 18 | 34  |
| 2527822 | CD99P1 | 0.01 | 0.03 | 0.00 | 0.00 | 0.00 | 33 | 29 | 30 | 42  |
| 2527823 | CD99P1 | 0.00 | 0.04 | 0.00 | 0.00 | 0.00 | 23 | 18 | 18 | 34  |
| 2527842 | CD99P1 | 0.00 | 0.04 | 0.00 | 0.00 | 0.03 | 23 | 18 | 18 | 34  |
| 2609371 | CD99   | 0.05 | 0.00 | 0.05 | 0.05 | 0.00 | 11 | 22 | 22 | 35  |
| 2609377 | CD99   | 0.00 | 0.00 | 0.00 | 0.00 | 0.00 | 11 | 20 | 22 | 34  |
| 2609385 | CD99   | 0.01 | 0.00 | 0.00 | 0.00 | 0.03 | 11 | 20 | 22 | 34  |
| 2609387 | CD99   | 0.02 | 0.00 | 0.00 | 0.00 | 0.03 | 11 | 20 | 22 | 34  |
| 2609396 | CD99   | 0.01 | 0.00 | 0.00 | 0.00 | 0.00 | 11 | 20 | 22 | 34  |
| 2609408 | CD99   | 0.01 | 0.00 | 0.00 | 0.00 | 0.00 | 11 | 20 | 22 | 34  |
| 2609410 | CD99   | 0.00 | 0.00 | 0.00 | 0.00 | 0.00 | 11 | 20 | 22 | 34  |
| 2609418 | CD99   | 0.00 | 0.00 | 0.00 | 0.05 | 0.00 | 11 | 20 | 22 | 34  |
| 2609424 | CD99   | 0.01 | 0.00 | 0.00 | 0.00 | 0.00 | 11 | 20 | 22 | 34  |
| 2609437 | CD99   | 0.00 | 0.00 | 0.00 | 0.00 | 0.00 | 11 | 20 | 22 | 34  |
| 2609458 | CD99   | 0.00 | 0.00 | 0.00 | 0.00 | 0.00 | 11 | 20 | 22 | 34  |
| 2609461 | CD99   | 0.02 | 0.00 | 0.00 | 0.00 | 0.00 | 11 | 20 | 22 | 34  |
| 2609941 | CD99   | 0.04 | 0.08 | 0.02 | 0.00 | 0.06 | 49 | 57 | 28 | 97  |
| 2610019 | CD99   | 0.00 | 0.00 | 0.00 | 0.00 | 0.00 | 51 | 57 | 28 | 97  |
| 2610026 | CD99   | 0.04 | 0.01 | 0.02 | 0.00 | 0.03 | 81 | 95 | 44 | 119 |
| 2610038 | CD99   | 0.02 | 0.00 | 0.00 | 0.00 | 0.00 | 50 | 61 | 36 | 66  |
| 2610040 | CD99   | 0.00 | 0.00 | 0.00 | 0.00 | 0.00 | 50 | 61 | 36 | 66  |
| 2610049 | CD99   | 0.01 | 0.00 | 0.00 | 0.00 | 0.03 | 50 | 61 | 35 | 66  |
| 2610061 | CD99   | 0.01 | 0.04 | 0.00 | 0.00 | 0.00 | 50 | 61 | 35 | 66  |
| 2610066 | CD99   | 0.01 | 0.04 | 0.00 | 0.00 | 0.00 | 50 | 61 | 35 | 66  |
| 2610078 | CD99   | 0.00 | 0.00 | 0.00 | 0.00 | 0.00 | 50 | 61 | 35 | 66  |
| 2610104 | CD99   | 0.00 | 0.00 | 0.00 | 0.00 | 0.00 | 50 | 61 | 35 | 66  |
| 2610107 | CD99   | 0.00 | 0.00 | 0.00 | 0.00 | 0.00 | 50 | 61 | 35 | 66  |
| 2610119 | CD99   | 0.01 | 0.00 | 0.00 | 0.00 | 0.00 | 50 | 61 | 35 | 66  |

|         |      |      |      |      |      |      |    |    |    |    |
|---------|------|------|------|------|------|------|----|----|----|----|
| 2610156 | CD99 | 0.00 | 0.00 | 0.00 | 0.00 | 0.00 | 50 | 61 | 33 | 66 |
| 2610170 | CD99 | 0.00 | 0.00 | 0.00 | 0.00 | 0.00 | 50 | 61 | 33 | 66 |
| 2610181 | CD99 | 0.06 | 0.00 | 0.05 | 0.00 | 0.01 | 74 | 65 | 20 | 68 |

---

A yellow background shows CpGs in duplicated regions. A pale blue background shows CpGs in deleted regions. When the methylation ratio is higher than 0.25, the methylation ratio is shown in red letters in the patients.
